## Overwinter survival of juvenile red squirrels

### 1 **Territory acquisition mediates the influence of predators and climate on juvenile red** 2 **squirrel survival**

3

4 Jack G. Hendrix <sup>a,\*</sup>, David N. Fisher <sup>a,b</sup>, April R. Martinig <sup>c</sup>, Stan Boutin <sup>c</sup>, Ben Dantzer <sup>d,e</sup>,  
5 Jeffrey E. Lane <sup>f</sup>, and Andrew G. McAdam <sup>a</sup>

6

7 <sup>a</sup> Department of Integrative Biology, University of Guelph, Guelph, ON, Canada

8 <sup>b</sup> Department of Psychology, Neuroscience & Behaviour, McMaster University, Hamilton, ON,  
9 Canada

10 <sup>c</sup> Department of Biological Sciences, University of Alberta, Edmonton, AB, Canada

11 <sup>d</sup> Department of Psychology, University of Michigan, Ann Arbor, MI, USA

12 <sup>e</sup> Department of Ecology & Evolutionary Biology, University of Michigan, Ann Arbor, MI, USA

13 <sup>f</sup> Department of Biology, University of Saskatchewan, Saskatoon, SK, Canada

14 \* Corresponding author e-mail address: jackhendrixeco@gmail.com

## Overwinter survival of juvenile red squirrels

### 15 **Abstract**

- 16 1) Juvenile survival to first breeding is a key life history stage. Survival through this period  
17 can be particularly challenging when it coincides with harsh environmental conditions  
18 like winter climate or food scarcity, and so cohort survival can be highly variable.  
19 However, the small size and dispersive nature of juveniles makes studying their survival  
20 difficult.
- 21 2) In territorial species, a key life history event is the acquisition of a territory. A territory is  
22 expected to enhance survival, but how it does so, possibly through mediating mortality, is  
23 not often identified. We tested how the timing of territory acquisition influenced the  
24 survival of juvenile North American red squirrels *Tamiasciurus hudsonicus*, hereafter red  
25 squirrels, and how the timing of this event mediated sources of mortality. We  
26 hypothesized that securing a territory prior to the caching season would reduce juvenile  
27 susceptibility to predation or climatic factors over winter.
- 28 3) Using 27 years of data on the survival of individually-marked juvenile red squirrels, we  
29 tested how the timing of territory acquisition influenced survival, whether the population  
30 density of red squirrel predators and mean temperature over winter were related to  
31 individual survival probability, and if territory ownership mediated these effects.
- 32 4) Juvenile survival was lower in years of high predator abundance and in colder winters.  
33 Autumn territory owners were less susceptible to lynx *Lynx canadensis*, and possibly  
34 mustelid *Mustela* and *Martes* spp., predation. Autumn territory owners had lower survival  
35 in colder winters, while non-owners had higher survival in cold winters.
- 36 5) Our results show how the timing of a life history event like territory acquisition can  
37 directly affect survival and also mediate the effects of biotic and abiotic factors later in

## Overwinter survival of juvenile red squirrels

38 life. This engenders a better understanding of the fitness consequences of the timing of  
39 key life history events.

40

41 **Key words:** juvenile survival, life history timing, lynx, mustelid, predation, red squirrel,  
42 *Tamiasciurus*, territory

43

### 44 **Introduction**

45 Survival as a juvenile, when individuals are no longer completely dependent on the parent but  
46 not yet sexually mature, is a crucial life history stage for all taxa (Ferguson & Fox, 1984;  
47 Gaillard, Festa-Bianchet, & Yoccoz, 1998; Searcy & Sponaugle, 2001). A large component of  
48 reproductive success is surviving to sexual maturity, hence juvenile survival can be a key  
49 determinant of lifetime fitness, and so variation in survival can dictate population dynamics  
50 (McAdam, Boutin, Sykes, & Humphries, 2007; Oli & Dobson, 2003). For example, rates of  
51 juvenile survival in large herbivores are highly variable year-to-year, and despite the fact that  
52 they do not determine population growth rates, they may be the key determinant of population  
53 dynamics (Gaillard, Festa-Bianchet, Yoccoz, Loison, & Toïgo, 2000). Understanding the causes  
54 of variation in juvenile survival and the selection this facilitates therefore shapes how we expect  
55 populations to change over time.

56 The time period between juvenile independence and first breeding poses particular  
57 challenges to survival as juvenile mortality is often high during this period. Climatic factors can  
58 have strong effects on survival of juveniles (Fuller, Stebbins, & Dyke, 1969; Schorr, Lukacs, &  
59 Florant, 2009) through a combination of limited food availability and increased thermoregulatory  
60 costs (Jackson, Trayhurn, & Speakman, 2001; Rödel et al., 2004), particularly over winter. Due

## Overwinter survival of juvenile red squirrels

61 to their small size and lack of experience, as well as their dispersive nature, juveniles can also be  
62 particularly vulnerable to predation (Garrett & Franklin, 1988; Rödel et al., 2015). Various  
63 behavioural and physiological responses such as adjusting metabolic rate (Wunder, Dobkin, &  
64 Gettinger, 1977), reducing activity (Merritt, 1986), or food caching (Morrison, Pelchat, Donahue,  
65 & Hik, 2009) can mitigate this risk. Understanding how these mediating traits alter juvenile  
66 survival is necessary to understand how selection shapes phenotypes.

67 The acquisition of a territory is a key life history event that can mediate sources of  
68 mortality in some species, by providing access to space, refuges and food stores. Timing of life  
69 history stages, such as birth or hatching (Rodríguez, van Noordwijk, Álvarez, & Barba, 2016), or  
70 developmental rate (van der Jeugd & Larsson, 1998) can have strong effects on survival at later  
71 life stages (O'Connor, Norris, Crossin, & Cooke, 2014). Territory acquisition is one such event:  
72 predation risk is elevated while searching for territories (Larsen & Boutin, 1994), and territory  
73 ownership also leads to increased food availability, particularly in food caching species. Earlier  
74 acquisition of a territory can, therefore, improve the probability of survival by reducing these  
75 risks sooner in life. It is well known that acquiring a territory provides benefits (reviewed in:  
76 Carpenter, 1987; e.g. Whitham, 1986). However, despite the potential importance of  
77 understanding how the timing of territory acquisition modifies juvenile survival and mediates  
78 sources of mortality, documenting the consequences for mortality risks of the timing of territory  
79 acquisition has not occurred, in part due to the difficulty in collecting such data.

80 North American red squirrels *Tamiasciurus hudsonicus* are an ideal organism to study  
81 how the timing of territory acquisition influences survival and mediates sources of juvenile  
82 mortality. Red squirrels in Yukon, Canada defend exclusive individual territories with a central  
83 cache of white spruce *Picea glauca* cones, their primary food source (Boutin & Schweiger, 1988;

## Overwinter survival of juvenile red squirrels

84 Fletcher et al., 2013). Holding a territory with a cache of food is considered necessary for red  
85 squirrels in these populations to survive over winter (Larsen & Boutin, 1994; Smith, 1968), as  
86 cached resources are essential for annual survival and reproduction (Fletcher et al., 2013;  
87 LaMontagne et al., 2013). White spruce cones ripen in early August and caching begins shortly  
88 thereafter and finishes at the end of September (Fletcher et al., 2010). Those juveniles with  
89 territories before this ripening begins are able to take advantage of that year's cone crop and  
90 increase their hoard size, whereas those that settle on territories later in the season can only take  
91 over what is left from the previous owner (Fisher et al., 2019) and have no opportunity to secure  
92 further resources before winter.

93 Juvenile annual over winter mortality is high, with an average of 73.6 % not surviving  
94 their first winter (McAdam et al., 2007), but this is highly variable annually (57 - 97 %)  
95 (McAdam & Boutin, 2003). Annual adult mortality in this population is low (20 % for two year  
96 old females; this steadily increases with age), thus much of the variation in lifetime reproductive  
97 success is linked to juvenile over winter mortality (McAdam et al., 2007). Acquiring a territory is  
98 therefore a key life history event. However, the main causes of juvenile mortality, and how they  
99 are influenced by the timing of territory acquisition, are not known.

100 Observational studies, while relatively limited, have identified lynx *Lynx canadensis*  
101 (Stuart-Smith & Boutin, 1995), goshawks *Accipiter gentilis* (Larsen & Boutin, 1994), and  
102 mustelids (Kerr & Descamps, 2008; O'Donoghue, Boutin, Hofer, & Boonstra, 2001) as predators  
103 of juvenile red squirrels (Goheen & Swihart, 2005; Haines et al., 2018; Smith, 1968; Steele,  
104 1998). Owning a territory, and thus having access to nests or tunnels, could act as spatial refugia  
105 and reduce vulnerability to predators (Cowlshaw, 1997; Everett & Ruiz, 1993). Furthermore, red  
106 squirrels with smaller caches have lower over winter survival (LaMontagne et al., 2013; Larivée,

## Overwinter survival of juvenile red squirrels

107 Boutin, Speakman, McAdam, & Humphries, 2010), suggesting that resource limitation is a  
108 source of over winter mortality. Owning a territory, and so regular use of nests, would provide  
109 thermal refugia during low temperatures (Greenwood & Harvey, 1982; Studd, Boutin, McAdam,  
110 Krebs, & Humphries, 2015). It therefore seems that a territory could both directly influence  
111 survival and change the suite of selection pressures that act on a juvenile red squirrel.

112 We aimed to better understand how territory acquisition affects juvenile over winter  
113 survival and mediates sources of mortality. To do so we used 27 years of longitudinal data to  
114 assess how holding a territory before autumn influences survival and the susceptibility of a  
115 juvenile to predation or low temperatures over winter.

116 Our first hypothesis was that earlier territory acquisition would give higher over winter  
117 survival compared to later territory acquisition (Berteaux & Boutin, 2000). We further  
118 hypothesized that cold temperatures and predators pose a mortality risk, so that over winter  
119 survival of juveniles would be lower in colder winters and when predators are abundant. Our key  
120 hypothesis is that timing of territory acquisition would moderate these effects, so that juveniles  
121 obtaining territories before autumn are less susceptible to predators (e.g. Cowlshaw 1997) and  
122 adverse weather (e.g. Greenwood and Harvey 1982) over winter.

123

## 124 **Materials and Methods**

### 125 *Data collection*

126 Our study was part of the Kluane Red Squirrel Project, an ongoing long-term study of a wild  
127 population of North American red squirrels within Champagne and Aishihik First Nations  
128 traditional territory along the Alaska Highway in southwestern Yukon, Canada (61° N, 138° W).  
129 We collected data from two study areas (~ 40 hectares each) separated by the Alaska Highway

## Overwinter survival of juvenile red squirrels

130 from 1989 to 2015. We conducted population censuses biannually in May (spring) and August  
131 (autumn) to identify all individuals and assign territory ownership. We assigned territory  
132 ownership based on territorial vocalisations ("rattling"; Lair, 1990) and behavioural observations.  
133 We also identified living individuals that did not own territories in autumn through trapping and  
134 behavioural observations. Adult red squirrels rarely relocate, other than through bequeathals by  
135 mothers where all or a part of her territory is given to offspring (Berteaux & Boutin, 2000;  
136 around 19 % of females do this each year; Lane et al., 2015; Larsen & Boutin, 1994a). Average  
137 juvenile dispersal distance is short (mean = 92 to 102 m; Berteaux & Boutin, 2000; Cooper et al.,  
138 2017) relative to the size of our study areas. Juveniles born on the edge of our study areas do not  
139 have lower apparent survival than those born in the core, suggesting that dispersal outside our  
140 study areas does not bias our mortality estimates (T. D. Kerr, Boutin, LaMontagne, McAdam, &  
141 Humphries, 2007; McAdam et al., 2007).

142 We used Tomahawk traps (Tomahawk Live Trap Co., Tomahawk, Wisconsin, U.S.A.)  
143 baited with peanut butter on or near each individual's midden to trap them. When handled for the  
144 first time, each individual was given numbered ear tags (Monel #1; 5 digits) with a unique  
145 combination of coloured wires or pipe cleaners to facilitate future identification without  
146 handling. We recorded body mass, sex, and reproductive status at each capture. We radio-  
147 collared reproductive females (model PD-2C, 4 g, Holohil Systems Limited, Carp, Ontario,  
148 Canada) to find nests. Females typically give birth to three pups (range: one – seven; Humphries  
149 & Boutin, 2000) in the spring (median birth date: 23 April). We removed juveniles from the nest  
150 after birth, and a second time at ~25 days old, to record litter size, pup mass, and sex, and to tag  
151 them. Growth rate (g/day) was calculated as the linear increase in mass between the nest entries.  
152 We calculated growth rates only for juveniles that weighed less than 50 g at the first nest entry

## Overwinter survival of juvenile red squirrels

153 and less than 100 g at the second nest entry (to ensure approximate linearity of the growth curve;  
154 McAdam & Boutin, 2003), and only for juveniles where the two weight measures were >5 days  
155 apart. Juveniles emerge from the nest around 42-50 days old and wean around 70 days (Larsen &  
156 Boutin, 1994). We considered juveniles surviving to the spring following the year of their birth  
157 to have recruited into the population. This research was approved by the University of Guelph  
158 Animal Care Committee (AUP 1807), the University of Alberta Animal Care and Use  
159 Committee for Biosciences and the University of Michigan Institutional Animal Care and Use  
160 Committee (PRO00007805).

161

### 162 *Predator and temperature data collection*

163 Our available temperature and predator data are annual, regional measures, so for this analysis  
164 we treated all juveniles born in the same year as experiencing the same conditions. We obtained  
165 monthly temperature records from Environment Canada's online historical weather database for  
166 the Haines Junction weather station (Climate ID 2100630, 60.77° N, 137.57° W), approximately  
167 35 km SE of our study area. We used mean temperature over winter, as we expected that climate  
168 would primarily influence over winter survival by increasing thermoregulatory costs as opposed  
169 to extreme weather events or precipitation. We averaged the monthly temperatures from October  
170 of a juvenile's birth year to the following March to obtain an annual average winter temperature.

171 We considered potential mammalian predators: mustelids (short-tailed weasel *Mustela*  
172 *erminea*, least weasel *M. nivalis*, and marten *Martes americana*) and lynx *Lynx canadensis*. We  
173 obtained abundance data for predators and their alternate prey from population monitoring in our  
174 region, first as part of the Kluane Boreal Forest Ecosystem Project (Krebs, 2001), and after 1996  
175 as part of the Community Ecological Monitoring Program (available at



## Overwinter survival of juvenile red squirrels

176 <http://www.zoology.ubc.ca/~krebs/kluane.html>). Repeated track counts along set transects over  
177 winter provided an estimate of species abundance as the mean number of tracks per 100 km of  
178 transect. We used the sum of short-tailed weasel, least weasel, and marten tracks as the total  
179 mustelid abundance for each year. The population densities of snowshoe hares *Lepus americanus*  
180 and red-backed voles *Myodes rutilus* were estimated with live trapping and mark-recapture,  
181 providing measures of alternate prey availability for these predators. These combinations were  
182 chosen as lynx are known hare specialists (O'Donoghue, Boutin, Krebs, Murray, & Hofer,  
183 1998), while weasels (the majority of the mustelids) are known vole specialists (Boonstra &  
184 Krebs, 2006), and both populations follow the cycles of their preferred prey (Boutin et al. 1995).  
185 While birds of prey such as goshawks *A. gentilis* are known predators of red squirrels (Larsen &  
186 Boutin, 1994), we were not able to include them in our analysis as population counts over time  
187 are not available. Such birds of prey primarily prey on snowshoe hares, and so their population  
188 sizes typically track those of the hares, as lynx population sizes do (Boutin et al. 1995). Therefore,  
189 the effect of lynx abundance may somewhat represent the overall effect of snowshoe hare  
190 predators on red squirrels.

191

### 192 *Statistical analyses of survival*

193 We used a binomial mixed effects model to test how predation and temperature interacted with  
194 autumn territory ownership to affect juvenile survival over winter. From 1989 to 2015, our  
195 analysis considered whether those juveniles that survived to the beginning of August (n = 1305  
196 squirrels) were still alive the following spring.

197 We included several factors previously shown to affect juvenile survival in our system  
198 (Descamps, Boutin, Berteaux, & Gaillard, 2008): these included squirrel population density

## Overwinter survival of juvenile red squirrels

199 (number of adults within a set 38 ha area; this area was consistent over the entire study period),  
200 spruce cone availability (annual index of cones produced on a consistent subset of trees on each  
201 study area; see: LaMontagne et al., 2005), a fixed effect of study area to account for any  
202 differences between the two study areas, birth date, growth rate, and sex. Growth rate, birth date,  
203 adult population density, and cone availability were standardized as z-scores for each study area  
204 in each year. This improves model convergence and interpretability of regression coefficients  
205 (Schielzeth, 2010).

206         For our main question – does territory ownership mediate how predators and climate  
207 affect survival – we included territory ownership in autumn as a binary predictor with  
208 temperature and predator abundance as numeric predictors, and fit interactions between autumn  
209 ownership and each of temperature, lynx, and mustelid abundances separately. We included  
210 separate interactions between the abundance of lynx and snowshoe hares, and mustelids and  
211 voles, so the effect of predators on red squirrels depended on the availability of preferred prey.  
212 Temperature and species abundances were standardized as z-scores across years. Finally, we  
213 included random effects of litter identity and year to account for variation in survival due to  
214 sibling and maternal interactions, as well as otherwise unaccounted for annual variation.

215         We also fitted a separate model with interactions of juvenile birth date and growth rate  
216 with predators and temperature, to determine whether these traits influence these sources of  
217 mortality. We present these results in the supporting information (Table S1): we found no  
218 evidence of predator abundance or temperature over winter acting as agents of selection on either  
219 of these traits.

## Overwinter survival of juvenile red squirrels

220 We conducted all statistical analyses using R version 3.3.3 (R Core Team 2017), with the  
221 packages lme4 (version 1.1-19; Bates et al., 2015), and lmerTest (version 2.0-33; Kuznetsova,  
222 Brockhoff, & Christensen 2016). Reported estimates are means  $\pm$  SE.

223

## 224 **Results**

### 225 *Over winter survival*

226 Among juveniles alive in August between 1989 – 2015, an average of 60 % survived to the  
227 following spring, but this was highly variable annually (21.4 – 94.1 %; Table 1). Juvenile  
228 survival was higher with increased cone availability ( $\beta = 0.38 \pm 0.11$ ,  $z = 3.45$ ,  $P < 0.001$ ; Table  
229 2) and years of lower adult population density ( $\beta = -0.69 \pm 0.15$ ,  $z = -4.45$ ,  $P < 0.001$ ). Female  
230 juveniles were more likely to survive over winter than males ( $\beta = 0.49 \pm 0.16$ ,  $z = 3.1$ ,  $P =$   
231 0.002), as were juveniles with higher growth rates ( $\beta = 0.22 \pm 0.10$ ,  $z = 2.13$ ,  $P = 0.033$ ). Birth  
232 date had no effect on over winter survival ( $\beta = -0.01 \pm 0.09$ ,  $z = -0.08$ ,  $P = 0.936$ ), nor were there  
233 any differences between study areas ( $\beta = 0.19 \pm 0.18$ ,  $z = 1.06$ ,  $P = 0.289$ ). The random effect of  
234 litter ID explained a significant amount of variation ( $\sigma^2 = 0.665$ ; likelihood ratio test  $X^2 = 7.867$ ,  
235  $df = 20$ ,  $P = 0.005$ ), but the random year effect did not contribute significantly to the model.

236

### 237 *Territory ownership and over winter survival*

238 Sixty-one percent of juveniles alive in August owned a territory, and these juveniles were more  
239 likely (79 %) to survive over winter than those who did not (33 %;  $\beta = 2.78 \pm 0.23$ ,  $z = 12.06$ ,  $P$   
240  $< 0.001$ ). Juveniles without territories in August were less likely to survive in years of high lynx  
241 ( $\beta = -0.68 \pm 0.28$ ,  $z = -2.41$ ,  $P = 0.016$ ) and mustelid ( $\beta = -0.38 \pm 0.14$ ,  $z = -2.70$ ,  $P = 0.007$ )  
242 abundance. There was a significant interaction between lynx abundance and territory ownership

## Overwinter survival of juvenile red squirrels

243 ( $\beta = 0.99 \pm 0.23$ ,  $z = 4.22$ ,  $P < 0.001$ ; Fig 1); increased lynx abundance had no effect on the over  
244 winter survival of juveniles that held territories by autumn. The mustelid – owner interaction was  
245 not significant, but in the same direction as for lynx, with mustelid abundance having a weaker  
246 effect on territory owners ( $\beta = 0.31 \pm 0.18$ ,  $z = 1.75$ ,  $P = 0.080$ ; Fig 2). The effects of predators  
247 on juvenile survival did not depend on the abundance of alternate prey (lynx x hare  $P = 0.187$ ;  
248 mustelid x vole  $P = 0.203$ ), although both the hare ( $\beta = 0.40 \pm 0.20$ ,  $z = 1.99$ ,  $P = 0.046$ ) and vole  
249 ( $\beta = -0.59 \pm 0.13$ ,  $z = -4.57$ ,  $P < 0.001$ ) main effects were significant.

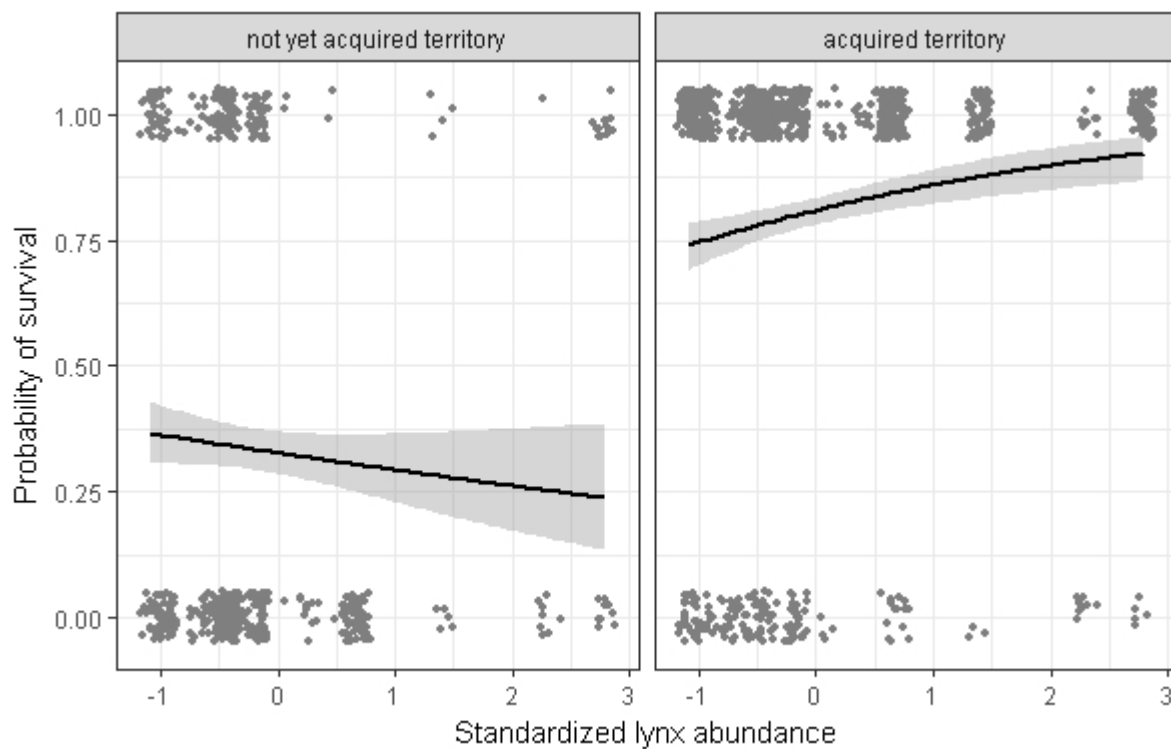

250  
251 Figure 1. Over winter survival of juveniles ( $n = 1305$ ) that had or had not acquired a territory by  
252 autumn. Juveniles without territories had lower survival when lynx were abundant (non-owners:  
253  $\beta = -0.68 \pm 0.28$ ,  $z = -2.41$ ,  $P = 0.016$ ), whereas the survival of juveniles with territories was  
254 unaffected by lynx abundance (owners:  $\beta = 0.31 \pm 0.21$ ,  $z = 1.49$ ,  $P = 0.14$ ; interaction  $\beta = 0.99$   
255  $\pm 0.23$ ,  $z = 4.22$ ,  $P < 0.001$ ).

256

## Overwinter survival of juvenile red squirrels

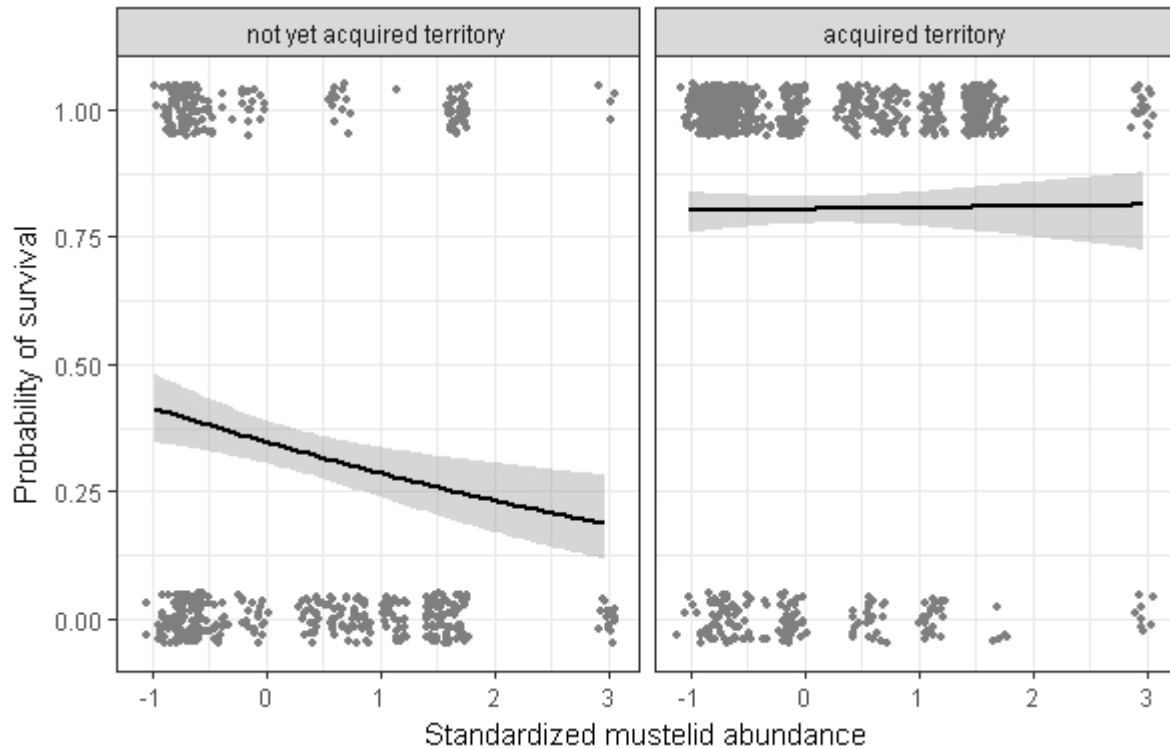

257

258 Figure 2. Over winter survival of juveniles ( $n = 1305$ ) that had or had not acquired a territory by  
259 autumn was lower when mustelids were abundant. Juveniles without territories by autumn were  
260 somewhat more affected by mustelid abundance (non-owners:  $\beta = -0.38 \pm 0.14$ ,  $z = -2.70$ ,  $P =$   
261  $0.007$ ) than territory owners (owners:  $\beta = -0.07 \pm 0.14$ ,  $z = -0.49$ ,  $P = 0.624$ ; interaction  $\beta = 0.31$   
262  $\pm 0.18$ ,  $z = 1.75$ ,  $P = 0.080$ ).

263

264 Temperature had opposing effects on survival for juveniles with and without territories by  
265 autumn (Fig 3). Juveniles without territories by autumn were less likely to survive warm winters  
266 ( $\beta = -0.35 \pm 0.18$ ,  $z = -1.99$ ,  $P = 0.047$ ), but this effect reversed for autumn territory owners  
267 (interaction  $\beta = 1.11 \pm 0.21$ ,  $z = 5.31$ ,  $P < 0.001$ ), which were more likely to survive warm  
268 winters ( $\beta = 0.76 \pm 0.13$ ,  $z = 5.31$ ,  $P < 0.001$ ).

## Overwinter survival of juvenile red squirrels

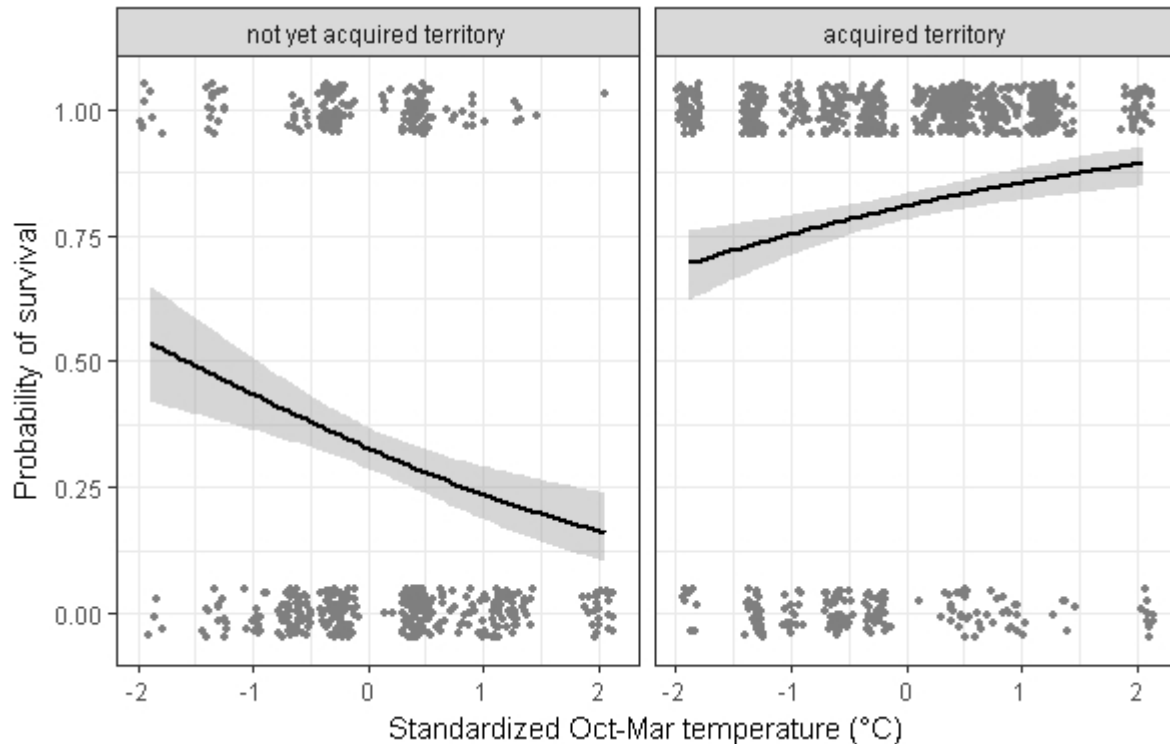

269

270 Figure 3. Over winter survival of juveniles ( $n = 1305$ ) that had or had not acquired a territory by  
271 autumn. Autumn territory owners survived better in warmer years (owners:  $\beta = 0.76 \pm 0.13$ ,  $z =$   
272  $5.87$ ,  $P < 0.001$ ), whereas warmer winters increased mortality of juveniles without territories at  
273 this time (non-owners:  $\beta = -0.35 \pm 0.18$ ,  $z = -1.99$ ,  $P = 0.047$ ; interaction  $\beta = 1.11 \pm 0.21$ ,  $z =$   
274  $5.31$ ,  $P < 0.001$ ).

275

## 276 Discussion

277

278 Juveniles that acquired territories earlier in the year were far more likely to survive the winter  
279 than those that had not yet found a territory before autumn. Average survival of juveniles that  
280 acquired territories before the start of cone caching (79 %) was comparable to survival of early-  
281 life adults in this population (80 %; McAdam et al., 2007). Juveniles without territories by

## Overwinter survival of juvenile red squirrels

282 autumn had much lower survival (33 %), as they may have never acquired a territory and so  
283 perished or acquired one late but lost the opportunity to cache resources in it, and so did not have  
284 a large enough stockpile of resources to survive over winter. Their lower estimated survival is  
285 unlikely to be because the juveniles without a territory had in fact moved off our study area, as  
286 survival is equal between juveniles originating from the centre of the study area and those at the  
287 edge (T. D. Kerr et al., 2007).

288 Territory ownership also affected how susceptible juveniles were to predators and  
289 weather over winter. Juveniles without territories by autumn were more susceptible to predators  
290 than those that had already settled. Territory ownership provides access to arboreal nests, midden  
291 tunnels, and increased familiarity with the local habitat (Clarke et al., 1993). Juveniles without  
292 territories by autumn may be travelling more through potentially high-risk environments as they  
293 forage for food or search for territories over winter, thereby increasing their vulnerability to  
294 predators (Garrett & Franklin, 1988; Metzgar, 1967). Higher rates of litter loss in red squirrels  
295 during years of high mustelid abundance (Studd et al., 2015) suggests that mustelids can access  
296 red squirrel nests (and likely tunnels) whereas lynx may be more effectively deterred by these  
297 structures. This may explain why the relationship between mustelid abundance and survival was  
298 not influenced as strongly by territory acquisition as was the relationship between lynx  
299 abundance and survival.

300 Survival of juveniles without a territory was higher in colder winters, with the opposite  
301 being true for juveniles holding a territory by autumn. We predicted that cold winters would lead  
302 to higher over winter mortality of territory owners, and we expected this to be magnified for non-  
303 territory owners, not reversed. There are some situations in which colder winters lead to higher  
304 survival, such as hibernating species (bats *Chalinolobus tuberculatus*; Pryde, O'Donnell, &

## Overwinter survival of juvenile red squirrels

305 Barker, 2005; jumping mice *Zapus hudsonicus preblei*; Schorr, Lukacs, & Florent, 2009) where  
306 this is thought to be due to less frequent arousal from hibernation (Humphries, Thomas, &  
307 Speakman, 2002). Red squirrels are non-hibernating, so this mechanism cannot explain why non-  
308 territory owners would benefit from colder winters.

309 We can suggest two alternative (but not mutually exclusive) explanations for why  
310 juveniles that acquired a territory late would have higher survival over winter. First, in colder  
311 years the incidence of nest-sharing among non-territory owners might be higher. Nest sharing,  
312 typically between kin, occurs in 19 % of female territory owners in this system, and is more  
313 common in colder winters (Williams et al., 2013). Juveniles without territories in autumn may be  
314 more likely to share nests with fellow non-territory owners, and this may improve their survival  
315 relative to juveniles with territories in autumn. Second, higher mortality of territory owners in  
316 colder winters creates vacancies, which may allow juveniles without territories by autumn a  
317 greater opportunity to claim a territory with plentiful cached food, enhancing survival (Dunham,  
318 Warner, & Lawson, 1995). This would give them relatively improved survival compared to  
319 warmer years where few territory owners would die. Which, if either, of these mechanisms  
320 accounts for the differential effect of winter temperatures remains to be tested.

321 We found both lynx and mustelid abundances were negatively associated with juvenile  
322 over winter survival. Previous work found that predation does not exert a strong influence on red  
323 squirrel populations in the boreal forest (Boonstra, Boutin, et al., 2001). However, in this study,  
324 the effects of annual lynx and mustelid abundance on juvenile survival (-0.68 and -0.32 for those  
325 without territories by autumn) were comparable in strength to the effect of cone availability  
326 (0.38), which is the primary driver of red squirrel population dynamics (LaMontagne et al.,  
327 2013). The relatively strong effects of predators on over winter survival in this study might



## Overwinter survival of juvenile red squirrels

328 appear contradictory to previous findings, but two distinctions can be made. First, overall  
329 population size and individual probability of survival are not directly comparable. While red  
330 squirrel population size may be dictated by the availability of food and territories, predation  
331 could still affect *which* individuals survive (“compensatory predation”; Errington, 1946).  
332 Second, this study was concerned with over winter survival of only juveniles, and predator  
333 population size had the strongest effect on the 39 % of juveniles that did not have territories by  
334 autumn. The probability of survival of these juveniles is already low, so variation in survival in  
335 this subset is not likely to have a large impact on the total population size.

336 We predicted that the effects of lynx and mustelid population sizes on juvenile survival  
337 would be mediated by the availability of their alternate prey. We did not find a significant  
338 interaction of either predator–prey pairing on red squirrel survival. One potential explanation for  
339 this could be that predator populations closely track their prey. For example, there were few  
340 years in our dataset with high predator and low prey densities with which to evaluate these  
341 interactions. Additionally, we grouped three mustelid species together, and they may respond  
342 differently to vole abundance. Furthermore, although lynx switch from hares to red squirrels  
343 when the former are rare (O’Donoghue, Boutin, Krebs, Zuleta, et al., 1998), lynx and mustelids  
344 may predate on juvenile red squirrels opportunistically if juveniles are more susceptible to  
345 predation regardless of alternate prey availability. Juveniles without territories by autumn could  
346 be more susceptible to this, if it occurs.

347 We did not anticipate that the population sizes of voles and hares would have significant  
348 effects themselves on over winter survival of juvenile red squirrels. High hare abundance was  
349 associated with increased juvenile survival, while years with high vole abundances had lower  
350 juvenile survival. Red squirrels will opportunistically predate on snowshoe hare leverets in the

## Overwinter survival of juvenile red squirrels

351 spring and summer (O'Donoghue, 1994), but this additional food source should not have a strong  
352 effect over winter. Voles are not in strong competition with juveniles for resources, given red  
353 squirrels access arboreal food sources unavailable to voles, and red-backed voles are broad  
354 omnivores, feeding on vegetation, fungi, and arthropods (Boonstra, Krebs, Gilbert, & Schweiger,  
355 2001). These species' population densities may covary with another factor that influences  
356 juvenile survival not included in our analysis, but what this factor might be remains unclear.

357         In our survival model, juveniles with higher growth rates were more likely to survive to  
358 spring, but birth date had no effect. Previous work in this population has observed strong  
359 selection on both birth date and growth rate in annual survival of juveniles (Dantzer et al., 2013;  
360 Fisher et al., 2017; McAdam & Boutin, 2003; Williams, Lane, Humphries, McAdam, & Boutin,  
361 2014). In preliminary models not including territory ownership, there was a significant effect of  
362 birth date on over winter survival. Once accounting for territory ownership, birth date stopped  
363 being important. This implies that early born juveniles are likely to acquire a territory sooner, but  
364 there are no further benefits of birth date for survival over winter. Both earlier birth dates and  
365 higher growth rates are thought to be beneficial in territory acquisition, but there was still an  
366 effect of growth rate on over winter survival after accounting for territory ownership.  
367 Furthermore, larger juveniles in the autumn are more likely to survive to spring (Larivée et al.  
368 2010). Among juveniles for which we have body mass measurements in August ( $n = 757$ ),  
369 juveniles with higher relative growth rates were larger ( $\beta = 7.95 \pm 1.61$ ,  $t = 4.93$ ,  $P < 0.001$ ), but  
370 earlier birth dates also had a significant effect on body mass in August ( $\beta = -8.89 \pm 1.25$ ,  $t = -$   
371  $7.11$ ,  $P < 0.001$ ) so this does not explain why growth rate provides further benefits over winter  
372 but birth date does not. Presumably, growth rate may be associated with other life history and

## Overwinter survival of juvenile red squirrels

373 behavioural traits (Biro & Stamps, 2008; Réale et al., 2010; Stamps, 2007) that could affect over  
374 winter survival.

375

### 376 *Conclusions*

377 We have identified how the timing of a life history event – territory acquisition – influences  
378 juvenile survival, and how it mediates biotic and abiotic factors that influence survival. This  
379 gives us insight into how one trait can affect the opportunity for selection on others, and  
380 therefore the routes through which organisms can arrive at “fit” phenotypes. We encourage more  
381 researchers to study key life stages such as the juvenile period, when survival can be highly  
382 variable and so the opportunity for selection high, to better understand how traits are selected in  
383 populations. As this study was primarily concerned with over winter dynamics, investigations of  
384 juveniles during territory prospection and before settlement, and which traits or conditions are  
385 associated with territorial acquisition, would be informative in further explaining the  
386 mechanisms behind some of the patterns we observed.

387

### 388 **Acknowledgements**

389 We acknowledge that the lands on which we have conducted our research for the past 30 years  
390 are within the traditional territory of the Champagne and Aishihik First Nations. We thank Agnes  
391 MacDonald for providing access to her trapline. We thank the many people that have been  
392 involved in data collection over the years within the Kluane Red Squirrel Project, and many  
393 thanks to Charles Krebs and the Kluane Boreal Forest Ecosystem Project and Community  
394 Ecological Monitoring Program for making their data freely available to the public. The Natural

## Overwinter survival of juvenile red squirrels

395 Sciences and Engineering Council of Canada, the National Science Foundation, and the Northern  
396 Scientific Training Program provided research support. We have no conflicts of interest. This is  
397 paper number XX of the Kluane Red Squirrel Project.

### 398 **Author contributions**

399 JH and DF conceived the ideas and conducted the analyses; JH, DF, and ARM led the writing of  
400 the manuscript; SB, BD, JL, and AGM managed long term data collection and revised initial  
401 drafts and analyses. All authors contributed critically to the drafts and gave final approval for  
402 publication.

### 403 **Data accessibility**

404 Data used to evaluate juvenile over winter survival, along with code to recreate analyses and  
405 figures, will be made available on Dryad upon publication.

### 406 **Literature Cited**

- 407 Bates, D., Maechler, M., Bolker, B., & Walker, S. (2015). Fitting linear mixed-effects models  
408 using lme4. *Journal of Statistical Software*, 67:1–8. doi:10.18637/jss.v067.i01
- 409 Berteaux, D., & Boutin, S. (2000). Breeding dispersal in female North American red squirrels.  
410 *Ecology*, 81(5), 1311–1326. Retrieved from [http://doi.wiley.com/10.1890/0012-](http://doi.wiley.com/10.1890/0012-9658(2000)081[1311:BDIFNA]2.0.CO;2)  
411 [9658\(2000\)081\[1311:BDIFNA\]2.0.CO;2](http://doi.wiley.com/10.1890/0012-9658(2000)081[1311:BDIFNA]2.0.CO;2)
- 412 Biro, P. A., & Stamps, J. A. (2008). Are animal personality traits linked to life-history  
413 productivity? *Trends in Ecology & Evolution*, 23(7), 361–368.  
414 doi:10.1016/j.tree.2008.04.003
- 415 Boonstra, R., Boutin, S., Byrom, A., Karels, T. I. M., Hubbs, A., Stuart-smith, K., ... Antpoebler,  
416 S. (2001). The Role of Red Squirrels and Arctic Ground Squirrels. *Ecosystem Dynamics of*

Overwinter survival of juvenile red squirrels

- 417        *the Boreal Forest: The Kluane Project*, 179–215.
- 418    Boonstra, R., & Krebs, C. J. (2006). Population limitation of the northern red-backed vole in the  
419        boreal forests of northern Canada. *Journal of Animal Ecology*, 75(6), 1269–1284.  
420        doi:10.1111/j.1365-2656.2006.01149.x
- 421    Boonstra, R., Krebs, C. J., Gilbert, B., & Schweiger, S. (2001). Voles and Mice. In C. J. Krebs,  
422        S. Boutin, & R. Boonstra (Eds.), *Ecosystem Dynamics of the Boreal Forest: The Kluane*  
423        *Project* (pp. 215–239). New York: Oxford University Press.
- 424    Boutin, S., Krebs, C. J., Boonstra, R., Dale, M. R. T., Hannon, S. J., Martin, K., ... Schweiger, S.  
425        (1995). Population changes of the vertebrate community during a snowshoe hare cycle in  
426        Canada's boreal forest. *Oikos*, 74(1), 69. doi:10.2307/3545676
- 427    Boutin, S., & Schweiger, S. (1988). Manipulation of intruder pressure in red squirrels  
428        (*Tamiasciurus hudsonicus*): effects on territory size and acquisition. *Canadian Journal of*  
429        *Zoology*, 66(10), 2270–2274. doi:10.1139/z88-337
- 430    Carpenter, F. L. (1987). Food abundance and territoriality: To defend or not to defend?  
431        *Integrative and Comparative Biology*, 27(2), 387–399. doi:10.1093/icb/27.2.387
- 432    Clarke, M. F., Burke, K., Lair, H., Pocklington, R., Clarke, M. F., Burke, K., ... Robert, L.  
433        (1993). Familiarity affects escape behaviour of the Eastern chipmunk, *Tamias striatus*.  
434        *Oikos*, 66(3), 533–537.
- 435    Cooper, E. B., Taylor, R. W., Kelley, A. D., Martinig, A. R., Boutin, S., Humphries, M. M., ...  
436        McAdam, A. G. (2017). Personality is correlated with natal dispersal in North American red  
437        squirrels (*Tamiasciurus hudsonicus*). *Behaviour*. doi:10.1163/1568539X-00003450
- 438    Cowlshaw, G. (1997). Refuge use and predation risk in a desert baboon population. *Animal*  
439        *Behaviour*, 54(2), 241–253. doi:10.1006/anbe.1996.0466

## Overwinter survival of juvenile red squirrels

- 440 Dantzer, B., Newman, A. E. M., Boonstra, R., Palme, R., Boutin, S., Humphries, M. M., &  
441 McAdam, A. G. (2013). Density triggers maternal hormones that increase adaptive  
442 offspring growth in a wild mammal. *Science*, *340*(6137), 1215–1217.  
443 doi:10.1126/science.1235765
- 444 Descamps, S., Boutin, S., Berteaux, D., & Gaillard, J.-M. (2008). Age-specific variation in  
445 survival, reproductive success and offspring quality in red squirrels: evidence of  
446 senescence. *Oikos*, *117*(9), 1406–1416. doi:10.1111/j.0030-1299.2008.16545.x
- 447 Dunham, M. L., Warner, R. R., & Lawson, J. W. (1995). The dynamics of territory acquisition: a  
448 model of two coexisting strategies. *Theoretical Population Biology*, *47*, 347–364.
- 449 Errington, P. L. (1946). Predation and Vertebrate Populations. *The Quarterly Review of Biology*,  
450 *21*(2), 144–177. doi:10.1086/395220
- 451 Everett, R. A., & Ruiz, G. M. (1993). Coarse woody debris as a refuge from predation in aquatic  
452 communities. An experimental test. *Oecologia*, *93*(4), 475–486.
- 453 Ferguson, G. W., & Fox, S. F. (1984). Annual variation of survival advantage of large juvenile  
454 side-blotched lizards, *Uta stansburiana*: its causes and evolutionary significance. *Evolution*,  
455 *38*(2), 342–349.
- 456 Fisher, D. N., Boutin, S., Dantzer, B., Humphries, M. M., Lane, J. E., & McAdam, A. G. (2017).  
457 Multilevel and sex-specific selection on competitive traits in North American red squirrels.  
458 *Evolution*, *71*(7), 1841–1854. doi:10.1111/evo.13270
- 459 Fisher, D. N., Haines, J. A., Boutin, S., Dantzer, B., Lane, J. E., Coltman, D. W., & McAdam, A.  
460 G. (2019). Indirect effects on fitness between individuals that have never met via an  
461 extended phenotype. *Ecology Letters*. doi:10.1111/ele.13230
- 462 Fletcher, Q. E., Boutin, S., Lane, J. E., LaMontagne, J. M., McAdam, A. G., Krebs, C. J., &

Overwinter survival of juvenile red squirrels

- 463 Humphries, M. M. (2010). The functional response of a hoarding seed predator to mast  
464 seeding. *Ecology*, *91*(9), 2673–2683. doi:10.1890/09-1816.1
- 465 Fletcher, Q. E., Landry-Cuerrier, M., Boutin, S., McAdam, A. G., Speakman, J. R., &  
466 Humphries, M. M. (2013). Reproductive timing and reliance on hoarded capital resources  
467 by lactating red squirrels. *Oecologia*, *173*(4), 1203–1215. doi:10.1007/s00442-013-2699-3
- 468 Fuller, W. A., Stebbins, L. L., & Dyke, G. R. (1969). Overwintering of small mammals near  
469 Great Slave Lake Northern Canada. *Arctic*, *22*(1), 34–55. doi:10.2307/40507757
- 470 Gaillard, J.-M., Festa-Bianchet, M., Yoccoz, N. G., Loison, A., & Toïgo, C. (2000). Temporal  
471 Variation in Fitness Components and Population Dynamics of Large Herbivores. *Annual*  
472 *Review of Ecology and Systematics*, *31*(1), 367–393. doi:10.1146/annurev.ecolsys.31.1.367
- 473 Gaillard, J. M., Festa-Bianchet, M., & Yoccoz, N. G. (1998). Population dynamics of large  
474 herbivores: Variable recruitment with constant adult survival. *Trends in Ecology and*  
475 *Evolution*, *13*(2), 58–63. doi:10.1016/S0169-5347(97)01237-8
- 476 Garrett, M. G., & Franklin, W. L. (1988). Behavioral Ecology of Dispersal in the Black-Tailed  
477 Prairie Dog. *Journal of Mammalogy*, *69*(2), 236–250. doi:10.2307/1381375
- 478 Goheen, J. R., & Swihart, R. K. (2005). Resource selection and predation of North American red  
479 squirrels in deciduous forest fragments. *Journal of Mammalogy*, *86*(1), 22–28.  
480 doi:10.1644/1545-1542(2005)086<0022:rsapon>2.0.co;2
- 481 Greenwood, P. J., & Harvey, P. H. (1982). The natal and breeding dispersal of birds. *Annual*  
482 *Review of Ecology and Systematics*, *13*, 1–21.
- 483 Haines, J. A., Coltman, D. W., Dantzer, B., Gorrell, J. C., Humphries, M. M., Lane, J. E., ...  
484 Boutin, S. (2018). Sexually selected infanticide by male red squirrels in advance of a mast  
485 year. *Ecology*. doi:10.1002/ecy.2158

Overwinter survival of juvenile red squirrels

- 486 Humphries, M. M., & Boutin, S. (2000). The Determinants of Optimal Litter Size in Free-  
487 Ranging Red Squirrels. *Ecology*, *81*(10), 2867–2877. Retrieved from  
488 <http://www.jstor.org/stable/177347?origin=crossref>
- 489 Humphries, M. M., Thomas, D. W., & Speakman, J. R. (2002). Climate-mediated energetic  
490 constraints on the distribution of hibernating mammals. *Nature*, *418*(6895), 313–316.  
491 doi:10.1038/nature00828
- 492 Jackson, D. M., Trayhurn, P., & Speakman, J. R. (2001). Associations between energetics and  
493 over-winter survival in the short-tailed field vole *Microtus agrestis*. *Journal of Animal*  
494 *Ecology*, *70*(4), 633–640. doi:10.1046/j.1365-2656.2001.00518.x
- 495 Kerr, T. D., Boutin, S., LaMontagne, J. M., McAdam, A. G., & Humphries, M. M. (2007).  
496 Persistent maternal effects on juvenile survival in North American red squirrels. *Biology*  
497 *Letters*, *3*(3), 289–291. doi:10.1098/rsbl.2006.0615
- 498 Kerr, T., & Descamps, S. (2008). Why do North American red squirrel, *Tamiasciurus*  
499 *hudsonicus*, mothers relocate their young? A predation-based hypothesis. *Canadian Field-*  
500 *Naturalist*, *122*(1), 65–66. doi:10.1258/la.2010.010166
- 501 Krebs, C. J. (2001). General Introduction. In C. J. Krebs, S. Boutin, & R. Boonstra (Eds.),  
502 *Ecosystem Dynamics of the Boreal Forest: The Kluane Project* (pp. 3–8). New York:  
503 Oxford University Press. doi:10.1016/S0006-3495(64)86921-6
- 504 Lair, H. (1990). The calls of the red squirrel — a contextual analysis of function. *Behaviour*,  
505 *115*(3), 254–282. doi:10.1163/156853990X00608
- 506 LaMontagne, J. M., Peters, S., & Boutin, S. (2005). A visual index for estimating cone  
507 production for individual white spruce trees. *Canadian Journal of Forest Research*, *35*(12),  
508 3020–3026. doi:10.1139/x05-210



Overwinter survival of juvenile red squirrels

- 509 LaMontagne, J. M., Williams, C. T., Donald, J. L., Humphries, M. M., McAdam, A. G., &  
510 Boutin, S. (2013). Linking intraspecific variation in territory size, cone supply, and survival  
511 of North American red squirrels. *Journal of Mammalogy*, *94*(5), 1048–1058.  
512 doi:10.1644/12-MAMM-A-245.1
- 513 Lane, J. E., McAdam, A. G., Charmantier, A., Humphries, M. M., Coltman, D. W., Fletcher, Q.,  
514 ... Boutin, S. (2015). Post-weaning parental care increases fitness but is not heritable in  
515 North American red squirrels. *Journal of Evolutionary Biology*, *28*(6), 1203–12.  
516 doi:10.1111/jeb.12633
- 517 Larivée, M. L., Boutin, S., Speakman, J. R., McAdam, A. G., & Humphries, M. M. (2010).  
518 Associations between over-winter survival and resting metabolic rate in juvenile North  
519 American red squirrels. *Functional Ecology*, *24*(3), 597–607. doi:10.1111/j.1365-  
520 2435.2009.01680.x
- 521 Larsen, K. W., & Boutin, S. (1994). Movements, survival, and settlement of red squirrel  
522 (*Tamiasciurus hudsonicus*) offspring. *Ecology*, *75*(1), 214–223. doi:10.2307/1939395
- 523 McAdam, A. G., & Boutin, S. (2003). Variation in viability selection among cohorts of juvenile  
524 red squirrels (*Tamiasciurus hudsonicus*). *Evolution; International Journal of Organic*  
525 *Evolution*, *57*(7), 1689–1697. doi:10.1111/j.0014-3820.2003.tb00374.x
- 526 McAdam, A. G., Boutin, S., Sykes, A. K., & Humphries, M. M. (2007). Life histories of female  
527 red squirrels and their contributions to population growth and lifetime fitness. *Ecoscience*,  
528 *14*(3), 362. doi:10.2980/1195-6860(2007)14[362:LHOFRS]2.0.CO;2
- 529 Merritt, J. F. (1986). Winter Survival Adaptations of the Short-Tailed Shrew (*Blarina*  
530 *brevicauda*) in an Appalachian Montane Forest. *Journal of Mammalogy*, *67*(3), 450–464.  
531 doi:10.2307/1381276

Overwinter survival of juvenile red squirrels

- 532 Metzgar, L. H. (1967). An experimental comparison of screech owl predation on resident and  
533 transient white-footed mice (*Peromyscus leucopus*). *Journal of Mammalogy*, 48(3), 387–  
534 391. doi:10.2307/1377771
- 535 Morrison, S. F., Pelchat, G., Donahue, A., & Hik, D. S. (2009). Influence of food hoarding  
536 behavior on the over-winter survival of pikas in strongly seasonal environments. *Oecologia*,  
537 159(1), 107–116. doi:10.1007/s00442-008-1197-5
- 538 O'Connor, C. M., Norris, D. R., Crossin, G. T., & Cooke, S. J. (2014). Biological carryover  
539 effects: linking common concepts and mechanisms in ecology and evolution. *Ecosphere*,  
540 5(3), 28.
- 541 O'Donoghue, M. (1994). Early survival of juvenile snowshoe hares. *Ecology*, 75(6), 1582–1592.
- 542 O'Donoghue, M., Boutin, S., Hofer, E. J., & Boonstra, R. (2001). Other mammalian predators. In  
543 C. J. Krebs, S. Boutin, & R. Boonstra (Eds.), *Ecosystem Dynamics of the Boreal Forest: The Kluane Project* (pp. 325–336). New York: Oxford University Press.
- 544 O'Donoghue, M., Boutin, S., Krebs, C. J., Murray, D. L., & Hofer, E. J. (1998). Behavioural  
545 responses of coyotes and lynx to the snowshoe hare cycle. *Oikos*, 82, 169–183.
- 546 O'Donoghue, M., Boutin, S., Krebs, C. J., Zuleta, G., Dennis, L., Donoghue, M. O., ... Hofer, E.  
547 J. (1998). Functional responses of coyotes and lynx to the snowshoe hare cycle. *Ecology*,  
548 79(4), 1193–1208. doi:10.1890/0012-9658(1998)079[1193:FROCAL]2.0.CO;2
- 549 Oli, M. K., & Dobson, F. S. (2003). The Relative Importance of Life-History Variables to  
550 Population Growth Rate in Mammals: Cole's Prediction Revisited. *The American*  
551 *Naturalist*, 161(3), 422–440. doi:10.1086/367591
- 552 Pryde, M. A., O'Donnell, C. F. J., & Barker, R. J. (2005). Factors influencing survival and long-  
553 term population viability of New Zealand long-tailed bats (*Chalinolobus tuberculatus*):  
554

Overwinter survival of juvenile red squirrels

- 555 Implications for conservation. *Biological Conservation*, 126(2), 175–185.  
556 doi:10.1016/J.BIOCON.2005.05.006
- 557 Réale, D., Garant, D., Humphries, M. M., Bergeron, P., Careau, V., & Montiglio, P.-O. (2010).  
558 Personality and the emergence of the pace-of-life syndrome concept at the population level.  
559 *Philosophical Transactions of the Royal Society of London. Series B, Biological Sciences*,  
560 365(1560), 4051–4063. doi:10.1098/rstb.2010.0208
- 561 Rödel, H. G., Bora, A., Kaetzke, P., Khaschei, M., Hutzelmeyer, H., & von Holst, D. (2004).  
562 Over-winter survival in subadult European rabbits: weather effects, density dependence, and  
563 the impact of individual characteristics. *Oecologia*, 140(4), 566–576. doi:10.1007/s00442-  
564 004-1616-1
- 565 Rödel, H. G., Zapka, M., Talke, S., Kornatz, T., Bruchner, B., & Hedler, C. (2015). Survival  
566 costs of fast exploration during juvenile life in a small mammal. *Behavioral Ecology and*  
567 *Sociobiology*, 69(2), 205–217. doi:10.1007/s00265-014-1833-5
- 568 Rodríguez, S., van Noordwijk, A. J., Álvarez, E., & Barba, E. (2016). A recipe for postfledging  
569 survival in great tits *Parus major*: be large and be early (but not too much). *Ecology and*  
570 *Evolution*, 6(13), 4458–4467. doi:10.1002/ece3.2192
- 571 Schielzeth, H. (2010). Simple means to improve the interpretability of regression coefficients.  
572 *Methods in Ecology and Evolution*, 1(2), 103–113. doi:10.1111/j.2041-210X.2010.00012.x
- 573 Schorr, R. A., Lukacs, P. M., & Florant, G. L. (2009). Body Mass and Winter Severity as  
574 Predictors of Overwinter Survival in Preble’s Meadow Jumping Mouse. *Journal of*  
575 *Mammalogy*, 90(1), 17–24. doi:10.1644/07-MAMM-A-392.1
- 576 Searcy, S. P., & Sponaugle, S. (2001). Selective mortality during the larval – juvenile transition  
577 in two coral reef fishes. *Ecology*, 82(9), 2452–2470. doi:10.1890/0012-

Overwinter survival of juvenile red squirrels

- 578 9658(2001)082[2452:SMDTLJ]2.0.CO;2
- 579 Smith, C. C. (1968). The adaptive nature of social organization in the genus of tree squirrels  
580 *Tamiasciurus*. *Ecological Monographs*, 38(1), 31–64.
- 581 Stamps, J. A. (2007). Growth-mortality tradeoffs and “personality traits” in animals. *Ecology*  
582 *Letters*, 10(5), 355–363. doi:10.1111/j.1461-0248.2007.01034.x
- 583 Steele, M. A. (1998). *Tamiasciurus hudsonicus*. *Mammalian Species*, 586(586), 1–9.  
584 doi:10.1890/0012-9623(2004)85
- 585 Stuart-Smith, A. K., & Boutin, S. (1995). Predation on red squirrels during a snowshoe hare  
586 decline. *Canadian Journal of Zoology*, 73(4), 713–722. doi:10.1139/z95-083
- 587 Studd, E. K., Boutin, S., McAdam, A. G., Krebs, C. J., & Humphries, M. M. (2015). Predators,  
588 energetics and fitness drive neonatal reproductive failure in red squirrels. *Journal of Animal*  
589 *Ecology*, 84(1), 249–259. doi:10.1111/1365-2656.12279
- 590 van der Jeugd, H., & Larsson, K. (1998). Pre-breeding survival of barnacle geese *Branta*  
591 *leucopsis* in relation to fledgling characteristics. *Journal of Animal Ecology*, 67, 953–966.
- 592 Whitham, T. G. (1986). Costs and benefits of territoriality: behavioral and reproductive release  
593 by competing aphids. *Ecology*, 67(1), 139–147. doi:10.2307/1938512
- 594 Williams, C. T., Gorrell, J. C., Lane, J. E., McAdam, A. G., Humphries, M. M., & Boutin, S.  
595 (2013). Communal nesting in an ‘asocial’ mammal: social thermoregulation among  
596 spatially dispersed kin. *Behavioral Ecology and Sociobiology*, 67(5), 757–763.  
597 doi:10.1007/s00265-013-1499-4
- 598 Williams, C. T., Lane, J. E., Humphries, M. M., McAdam, A. G., & Boutin, S. (2014).  
599 Reproductive phenology of a food-hoarding mast-seed consumer: Resource- and density-  
600 dependent benefits of early breeding in red squirrels. *Oecologia*, 174(3), 777–788.

Overwinter survival of juvenile red squirrels

601 doi:10.1007/s00442-013-2826-1

602 Wunder, B. A., Dobkin, D. S., & Gettinger, R. D. (1977). Shifts of thermogenesis in the prairie

603 vole. *Oecologia*, 29, 11–26.

604

## Overwinter survival of juvenile red squirrels

### 605 **Tables**

606 Table 1. Probability of over winter survival for juvenile red squirrels alive in August 1989 –  
607 2015 ( $n = 1305$ ), with adult density for each year (individuals/ha) and number of juveniles alive  
608 in autumn (cohort size).

| Year | Adult population density<br>(individuals/ha) | Autumn cohort size | Juvenile survival (%) |
|------|----------------------------------------------|--------------------|-----------------------|
| 1989 | 1.25                                         | 6                  | 66.7                  |
| 1990 | 1.30                                         | 13                 | 61.5                  |
| 1991 | 1.18                                         | 28                 | 85.7                  |
| 1992 | 1.31                                         | 46                 | 30.4                  |
| 1993 | 1.23                                         | 121                | 71.1                  |
| 1994 | 2.20                                         | 28                 | 21.4                  |
| 1995 | 1.60                                         | 75                 | 82.7                  |
| 1996 | 1.88                                         | 15                 | 60.0                  |
| 1997 | 1.86                                         | 51                 | 94.1                  |
| 1998 | 2.14                                         | 78                 | 82.1                  |
| 1999 | 3.93                                         | 25                 | 36.0                  |
| 2000 | 2.56                                         | 24                 | 58.3                  |
| 2001 | 1.84                                         | 56                 | 51.8                  |
| 2002 | 1.63                                         | 49                 | 51.0                  |
| 2003 | 1.22                                         | 34                 | 70.6                  |
| 2004 | 1.02                                         | 44                 | 61.4                  |
| 2005 | 1.05                                         | 98                 | 66.3                  |
| 2006 | 2.02                                         | 47                 | 46.8                  |
| 2007 | 1.40                                         | 72                 | 55.6                  |
| 2008 | 1.40                                         | 30                 | 43.3                  |
| 2009 | 0.94                                         | 44                 | 50.0                  |
| 2010 | 0.73                                         | 100                | 66.0                  |
| 2011 | 1.75                                         | 32                 | 81.3                  |
| 2012 | 1.86                                         | 50                 | 46.0                  |
| 2013 | 1.73                                         | 54                 | 63.0                  |

### Overwinter survival of juvenile red squirrels

|                  |                 |              |                |
|------------------|-----------------|--------------|----------------|
| 2014             | 1.57            | 150          | 71.3           |
| 2015             | 3.15            | 18           | 44.4           |
| Average $\pm$ SE | 1.69 $\pm$ 0.13 | 51 $\pm$ 6.6 | 60.0 $\pm$ 3.4 |

---

609

610

Overwinter survival of juvenile red squirrels

611 Table 2. Mixed effects binomial model of juveniles red squirrel over winter survival ( $n = 1305$ ),  
 612 testing whether territory ownership by autumn mediates effects of predators and temperature on  
 613 over winter survival, including random effects of litter ID and year (conditional  $R^2 = 0.44$ ).

| Term                                  | Estimate $\pm$ SE | $z$   | $P$     |
|---------------------------------------|-------------------|-------|---------|
| Std. density                          | -0.69 $\pm$ 0.15  | -4.45 | < 0.001 |
| Std. cones                            | 0.38 $\pm$ 0.11   | 3.45  | < 0.001 |
| Std. growth rate                      | 0.22 $\pm$ 0.10   | 2.13  | 0.033   |
| Std. birth date                       | -0.01 $\pm$ 0.09  | -0.08 | 0.936   |
| Grid (SU)                             | 0.19 $\pm$ 0.18   | 1.06  | 0.289   |
| Sex (male)                            | -0.49 $\pm$ 0.16  | -3.1  | 0.002   |
| Autumn owner (yes)                    | 2.78 $\pm$ 0.23   | 12.06 | < 0.001 |
| Std. lynx                             | -0.68 $\pm$ 0.28  | -2.41 | 0.016   |
| Std. hares                            | 0.40 $\pm$ 0.20   | 1.99  | 0.046   |
| Std. mustelid                         | -0.38 $\pm$ 0.14  | -2.7  | 0.007   |
| Std. voles                            | -0.59 $\pm$ 0.13  | -4.57 | < 0.001 |
| Std. temperature                      | -0.35 $\pm$ 0.18  | -1.99 | 0.047   |
| Std. lynx : Std. hares                | 0.12 $\pm$ 0.09   | 1.32  | 0.187   |
| Std. mustelid : Std. voles            | 0.14 $\pm$ 0.11   | 1.27  | 0.203   |
| Autumn owner (yes) : Std. lynx        | 0.99 $\pm$ 0.23   | 4.22  | < 0.001 |
| Autumn owner (yes) : Std. mustelid    | 0.31 $\pm$ 0.18   | 1.75  | 0.080   |
| Autumn owner (yes) : Std. temperature | 1.11 $\pm$ 0.21   | 5.31  | < 0.001 |
| Random effects                        | Variance          |       |         |
| Litter ID                             | 0.665             |       |         |
| Year                                  | 0.000             |       |         |

614
