## Overwinter survival of juvenile red squirrels

### 1 **Territory acquisition mediates the influence of predators and climate on juvenile red** 2 **squirrel survival**

3

4 Jack G. Hendrix <sup>a,b,\*</sup>, David N. Fisher <sup>b,c</sup>, April Robin Martinig <sup>d</sup>, Stan Boutin <sup>d</sup>, Ben Dantzer <sup>e,f</sup>,  
5 Jeffrey E. Lane <sup>g</sup>, and Andrew G. McAdam <sup>b</sup>

6

7 <sup>a</sup> Cognitive and Behavioural Ecology Interdisciplinary Program, Memorial University of  
8 Newfoundland, St. John's, NL, Canada

9 <sup>b</sup> Department of Integrative Biology, University of Guelph, Guelph, ON, Canada

10 <sup>c</sup> Department of Psychology, Neuroscience & Behaviour, McMaster University, Hamilton, ON,  
11 Canada

12 <sup>d</sup> Department of Biological Sciences, University of Alberta, Edmonton, AB, Canada

13 <sup>e</sup> Department of Psychology, University of Michigan, Ann Arbor, MI, USA

14 <sup>f</sup> Department of Ecology & Evolutionary Biology, University of Michigan, Ann Arbor, MI, USA

15 <sup>g</sup> Department of Biology, University of Saskatchewan, Saskatoon, SK, Canada

16 \* Corresponding author e-mail address: jackhendrixeco@gmail.com

17 **Abstract**

- 18 1) Juvenile survival to first breeding is a key life history stage. Survival through this period  
19 can be particularly challenging when it coincides with harsh environmental conditions  
20 like winter climate or food scarcity, and so cohort survival can be highly variable.  
21 However, the small size and dispersive nature of juveniles makes studying their survival  
22 difficult.
- 23 2) In territorial species, a key life history event is the acquisition of a territory. A territory is  
24 expected to enhance survival, but how it does so, possibly through mediating mortality, is  
25 not often identified. We tested how the timing of territory acquisition influenced the  
26 survival of juvenile North American red squirrels *Tamiasciurus hudsonicus*, hereafter red  
27 squirrels, and how the timing of this event mediated sources of mortality. We  
28 hypothesized that securing a territory prior to the caching season would reduce juvenile  
29 susceptibility to predation or climatic factors over winter.
- 30 3) Using 27 years of data on the survival of individually-marked juvenile red squirrels, we  
31 tested how the timing of territory acquisition influenced survival, whether the population  
32 density of red squirrel predators and mean temperature over winter were related to  
33 individual survival probability, and if territory ownership mediated these effects.
- 34 4) Juvenile survival was lower in years of high predator abundance and in colder winters.  
35 Autumn territory owners were less susceptible to lynx *Lynx canadensis*, and possibly  
36 mustelid *Mustela* and *Martes* spp., predation. Autumn territory owners had lower survival  
37 in colder winters, while non-owners had higher survival in cold winters.
- 38 5) Our results show how the timing of a life history event like territory acquisition can  
39 directly affect survival and also mediate the effects of biotic and abiotic factors later in

40 life. This engenders a better understanding of the fitness consequences of the timing of  
41 key life history events.

42

43 **Key words:** juvenile survival, life history timing, lynx, mustelid, predation, red squirrel,  
44 *Tamiasciurus*, territory

45

## 46 **Introduction**

47 Survival as a juvenile, when individuals are no longer completely dependent on the parent but  
48 not yet sexually mature, is a crucial life history stage for all taxa (Ferguson & Fox, 1984;  
49 Gaillard, Festa-Bianchet, & Yoccoz, 1998; Searcy & Sponaugle, 2001). A large component of  
50 reproductive success is surviving to sexual maturity, hence juvenile survival can be a key  
51 determinant of lifetime fitness, and so variation in survival can dictate population dynamics  
52 (McAdam, Boutin, Sykes, & Humphries, 2007; Oli & Dobson, 2003). For example, rates of  
53 juvenile survival in large herbivores are highly variable year-to-year, and despite the fact that  
54 they do not determine population growth rates, they may be the key determinant of population  
55 dynamics (Gaillard, Festa-Bianchet, Yoccoz, Loison, & Toïgo, 2000). Understanding the causes  
56 of variation in juvenile survival and the selection this facilitates therefore shapes how we expect  
57 populations to change over time.

58 The time period between juvenile independence and first breeding poses particular  
59 challenges to survival as juvenile mortality is often high during this period. Climatic factors can  
60 have strong effects on survival of juveniles (Fuller, Stebbins, & Dyke, 1969; Schorr, Lukacs, &  
61 Florant, 2009) through a combination of limited food availability and increased thermoregulatory  
62 costs (Jackson, Trayhurn, & Speakman, 2001; Rödel et al., 2004), particularly over winter. Due

## Overwinter survival of juvenile red squirrels

63 to their small size and lack of experience, as well as their dispersive nature, juveniles can also be  
64 particularly vulnerable to predation (Garrett & Franklin, 1988; Rödel et al., 2015). Various  
65 behavioural and physiological responses such as adjusting metabolic rate (Wunder, Dobkin, &  
66 Gettinger, 1977), reducing activity (Merritt, 1986), or food caching (Morrison, Pelchat, Donahue,  
67 & Hik, 2009) can mitigate this risk. Understanding how these mediating traits alter juvenile  
68 survival is necessary to understand how selection shapes phenotypes.

69 The acquisition of a territory is a key life history event that can mediate sources of  
70 mortality in some species, by providing access to space, refuges and food stores. Timing of life  
71 history stages, such as birth or hatching (Rodríguez, van Noordwijk, Álvarez, & Barba, 2016), or  
72 developmental rate (van der Jeugd & Larsson, 1998) can have strong effects on survival at later  
73 life stages (O'Connor, Norris, Crossin, & Cooke, 2014). Territory acquisition is one such event:  
74 predation risk is elevated while searching for territories (Larsen & Boutin, 1994), and territory  
75 ownership also leads to increased food availability, particularly in food caching species. Earlier  
76 acquisition of a territory can, therefore, improve the probability of survival by reducing these  
77 risks sooner in life. It is well known that acquiring a territory provides benefits (reviewed in:  
78 Carpenter, 1987; e.g. Whitham, 1986). However, despite the potential importance of  
79 understanding how the timing of territory acquisition modifies juvenile survival and mediates  
80 sources of mortality, documenting the consequences for mortality risks of the timing of territory  
81 acquisition has not occurred, in part due to the difficulty in collecting such data.

82 North American red squirrels *Tamiasciurus hudsonicus* are an ideal organism to study  
83 how the timing of territory acquisition influences survival and mediates sources of juvenile  
84 mortality. Red squirrels in Yukon, Canada defend exclusive individual territories with a central  
85 cache of white spruce *Picea glauca* cones, their primary food source (Boutin & Schweiger, 1988;

## Overwinter survival of juvenile red squirrels

86 Fletcher et al., 2013). Holding a territory with a cache of food is considered necessary for red  
87 squirrels in these populations to survive over winter (Larsen & Boutin, 1994; Smith, 1968), as  
88 cached resources are essential for annual survival and reproduction (Fletcher et al., 2013;  
89 LaMontagne et al., 2013). White spruce cones ripen in early August and caching begins shortly  
90 thereafter and finishes at the end of September (Fletcher et al., 2010). Those juveniles with  
91 territories before this ripening begins are able to take advantage of that year's cone crop and  
92 increase their hoard size, whereas those that settle on territories later in the season can only take  
93 over what is left from the previous owner (Fisher et al., 2019) and have no opportunity to secure  
94 further resources before winter.

95 Juvenile annual over winter mortality is high, with an average of 73.6 % not surviving  
96 their first winter (McAdam et al., 2007), but this is highly variable annually (57 - 97 %)  
97 (McAdam & Boutin, 2003). Annual adult mortality in this population is low (20 % for two year  
98 old females; this steadily increases with age), thus much of the variation in lifetime reproductive  
99 success is linked to juvenile over winter mortality (McAdam et al., 2007). Acquiring a territory is  
100 therefore a key life history event. However, the main causes of juvenile mortality, and how they  
101 are influenced by the timing of territory acquisition, are not known.

102 Observational studies, while relatively limited, have identified lynx *Lynx canadensis*  
103 (Stuart-Smith & Boutin, 1995), goshawks *Accipiter gentilis* (Larsen & Boutin, 1994), and  
104 mustelids (Kerr & Descamps, 2008; O'Donoghue, Boutin, Hofer, & Boonstra, 2001) as predators  
105 of juvenile red squirrels (Goheen & Swihart, 2005; Haines et al., 2018; Smith, 1968; Steele,  
106 1998). Owning a territory, and thus having access to nests or tunnels, could act as spatial refugia  
107 and reduce vulnerability to predators (Cowlshaw, 1997; Everett & Ruiz, 1993). Furthermore, red  
108 squirrels with smaller caches have lower over winter survival (LaMontagne et al., 2013; Larivée,

## Overwinter survival of juvenile red squirrels

109 Boutin, Speakman, McAdam, & Humphries, 2010), suggesting that resource limitation is a  
110 source of over winter mortality. Owning a territory, and so regular use of nests, would provide  
111 thermal refugia during low temperatures (Greenwood & Harvey, 1982; Studd, Boutin, McAdam,  
112 Krebs, & Humphries, 2015). It therefore seems that a territory could both directly influence  
113 survival and change the suite of selection pressures that act on a juvenile red squirrel.

114 We aimed to better understand how territory acquisition affects juvenile over winter  
115 survival and mediates sources of mortality. To do so we used 27 years of longitudinal data to  
116 assess how holding a territory before autumn influences survival and the susceptibility of a  
117 juvenile to predation or low temperatures over winter.

118 Our first hypothesis was that earlier territory acquisition would give higher over winter  
119 survival compared to later territory acquisition (Berteaux & Boutin, 2000). We further  
120 hypothesized that cold temperatures and predators pose a mortality risk, so that over winter  
121 survival of juveniles would be lower in colder winters and when predators are abundant. Our key  
122 hypothesis is that timing of territory acquisition would moderate these effects, so that juveniles  
123 obtaining territories before autumn are less susceptible to predators (e.g. Cowlshaw 1997) and  
124 adverse weather (e.g. Greenwood and Harvey 1982) over winter.

125

## 126 **Materials and Methods**

### 127 *Data collection*

128 Our study was part of the Kluane Red Squirrel Project, an ongoing long-term study of a wild  
129 population of North American red squirrels within Champagne and Aishihik First Nations  
130 traditional territory along the Alaska Highway in southwestern Yukon, Canada (61° N, 138° W).  
131 We collected data from two study areas (~ 40 hectares each) separated by the Alaska Highway

## Overwinter survival of juvenile red squirrels

132 from 1989 to 2015. We conducted population censuses biannually in May (spring) and August  
133 (autumn) to identify all individuals and assign territory ownership. We assigned territory  
134 ownership based on territorial vocalisations ("rattling"; Lair, 1990) and behavioural observations.  
135 We also identified living individuals that did not own territories in autumn through trapping and  
136 behavioural observations. Adult red squirrels rarely relocate, other than through bequeathals by  
137 mothers where all or a part of her territory is given to offspring (Berteaux & Boutin, 2000;  
138 around 19 % of females do this each year; Lane et al., 2015; Larsen & Boutin, 1994a). Average  
139 juvenile dispersal distance is short (mean = 92 to 102 m; Berteaux & Boutin, 2000; Cooper et al.,  
140 2017) relative to the size of our study areas. Juveniles born on the edge of our study areas do not  
141 have lower apparent survival than those born in the core, suggesting that dispersal outside our  
142 study areas does not bias our mortality estimates (T. D. Kerr, Boutin, LaMontagne, McAdam, &  
143 Humphries, 2007; McAdam et al., 2007).

144 We used Tomahawk traps (Tomahawk Live Trap Co., Tomahawk, Wisconsin, U.S.A.)  
145 baited with peanut butter on or near each individual's midden to trap them. When handled for the  
146 first time, each individual was given numbered ear tags (Monel #1; 5 digits) with a unique  
147 combination of coloured wires or pipe cleaners to facilitate future identification without  
148 handling. We recorded body mass, sex, and reproductive status at each capture. We radio-  
149 collared reproductive females (model PD-2C, 4 g, Holohil Systems Limited, Carp, Ontario,  
150 Canada) to find nests. Females typically give birth to three pups (range: one – seven; Humphries  
151 & Boutin, 2000) in the spring (median birth date: 23 April). We removed juveniles from the nest  
152 after birth, and a second time at ~25 days old, to record litter size, pup mass, and sex, and to tag  
153 them. Growth rate (g/day) was calculated as the linear increase in mass between the nest entries.  
154 We calculated growth rates only for juveniles that weighed less than 50 g at the first nest entry

## Overwinter survival of juvenile red squirrels

155 and less than 100 g at the second nest entry (to ensure approximate linearity of the growth curve;  
156 McAdam & Boutin, 2003), and only for juveniles where the two weight measures were >5 days  
157 apart. Juveniles emerge from the nest around 42-50 days old and wean around 70 days (Larsen &  
158 Boutin, 1994). We considered juveniles surviving to the spring following the year of their birth  
159 to have recruited into the population. This research was approved by the University of Guelph  
160 Animal Care Committee (AUP 1807), the University of Alberta Animal Care and Use  
161 Committee for Biosciences and the University of Michigan Institutional Animal Care and Use  
162 Committee (PRO00007805).

163

### 164 *Predator and temperature data collection*

165 Our available temperature and predator data are annual, regional measures, so for this analysis  
166 we treated all juveniles born in the same year as experiencing the same conditions. We obtained  
167 monthly temperature records from Environment Canada's online historical weather database for  
168 the Haines Junction weather station (Climate ID 2100630, 60.77° N, 137.57° W), approximately  
169 35 km SE of our study area. We used mean temperature over winter, as we expected that climate  
170 would primarily influence over winter survival by increasing thermoregulatory costs as opposed  
171 to extreme weather events or precipitation. We averaged the monthly temperatures from October  
172 of a juvenile's birth year to the following March to obtain an annual average winter temperature.

173 We considered potential mammalian predators: mustelids (short-tailed weasel *Mustela*  
174 *erminea*, least weasel *M. nivalis*, and marten *Martes americana*) and lynx *Lynx canadensis*. We  
175 obtained abundance data for predators and their alternate prey from population monitoring in our  
176 region, first as part of the Kluane Boreal Forest Ecosystem Project (Krebs, 2001), and after 1996  
177 as part of the Community Ecological Monitoring Program (available at



## Overwinter survival of juvenile red squirrels

178 <http://www.zoology.ubc.ca/~krebs/kluane.html>). Repeated track counts along set transects over  
179 winter provided an estimate of species abundance as the mean number of tracks per 100 km of  
180 transect. We used the sum of short-tailed weasel, least weasel, and marten tracks as the total  
181 mustelid abundance for each year. The population densities of snowshoe hares *Lepus americanus*  
182 and red-backed voles *Myodes rutilus* were estimated with live trapping and mark-recapture,  
183 providing measures of alternate prey availability for these predators. These combinations were  
184 chosen as lynx are known hare specialists (O'Donoghue, Boutin, Krebs, Murray, & Hofer,  
185 1998), while weasels (the majority of the mustelids) are known vole specialists (Boonstra &  
186 Krebs, 2006), and both populations follow the cycles of their preferred prey (Boutin et al. 1995).  
187 While birds of prey such as goshawks *A. gentilis* are known predators of red squirrels (Larsen &  
188 Boutin, 1994), we were not able to include them in our analysis as population counts over time  
189 are not available. Such birds of prey primarily prey on snowshoe hares, and so their population  
190 sizes typically track those of the hares, as lynx population sizes do (Boutin et al. 1995). Therefore,  
191 the effect of lynx abundance may somewhat represent the overall effect of snowshoe hare  
192 predators on red squirrels.

193

### 194 *Statistical analyses of survival*

195 We used a binomial mixed effects model to test how predation and temperature interacted with  
196 autumn territory ownership to affect juvenile survival over winter. From 1989 to 2015, our  
197 analysis considered whether those juveniles that survived to the beginning of August (n = 1305  
198 squirrels) were still alive the following spring.

199 We included several factors previously shown to affect juvenile survival in our system  
200 (Descamps, Boutin, Berteaux, & Gaillard, 2008): these included squirrel population density

## Overwinter survival of juvenile red squirrels

201 (number of adults within a set 38 ha area; this area was consistent over the entire study period),  
202 spruce cone availability (annual index of cones produced on a consistent subset of trees on each  
203 study area; see: LaMontagne et al., 2005), a fixed effect of study area to account for any  
204 differences between the two study areas, birth date, growth rate, and sex. Growth rate, birth date,  
205 adult population density, and cone availability were standardized as z-scores for each study area  
206 in each year. This improves model convergence and interpretability of regression coefficients  
207 (Schielzeth, 2010).

208         For our main question – does territory ownership mediate how predators and climate  
209 affect survival – we included territory ownership in autumn as a binary predictor with  
210 temperature and predator abundance as numeric predictors, and fit interactions between autumn  
211 ownership and each of temperature, lynx, and mustelid abundances separately. We included  
212 separate interactions between the abundance of lynx and snowshoe hares, and mustelids and  
213 voles, so the effect of predators on red squirrels depended on the availability of preferred prey.  
214 Temperature and species abundances were standardized as z-scores across years. Finally, we  
215 included random effects of litter identity and year to account for variation in survival due to  
216 sibling and maternal interactions, as well as otherwise unaccounted for annual variation.

217         We also fitted a separate model with interactions of juvenile birth date and growth rate  
218 with predators and temperature, to determine whether these traits influence these sources of  
219 mortality. We present these results in the supporting information (Table S1): we found no  
220 evidence of predator abundance or temperature over winter acting as agents of selection on either  
221 of these traits.

## Overwinter survival of juvenile red squirrels

222 We conducted all statistical analyses using R version 3.3.3 (R Core Team 2017), with the  
223 packages lme4 (version 1.1-19; Bates et al., 2015), and lmerTest (version 2.0-33; Kuznetsova,  
224 Brockhoff, & Christensen 2016). Reported estimates are means  $\pm$  SE.

225

## 226 **Results**

### 227 *Over winter survival*

228 Among juveniles alive in August between 1989 – 2015, an average of 60 % survived to the  
229 following spring, but this was highly variable annually (21.4 – 94.1 %; Table 1). Juvenile  
230 survival was higher with increased cone availability ( $\beta = 0.38 \pm 0.11$ ,  $z = 3.45$ ,  $P < 0.001$ ; Table  
231 2) and years of lower adult population density ( $\beta = -0.69 \pm 0.15$ ,  $z = -4.45$ ,  $P < 0.001$ ). Female  
232 juveniles were more likely to survive over winter than males ( $\beta = 0.49 \pm 0.16$ ,  $z = 3.1$ ,  $P =$   
233 0.002), as were juveniles with higher growth rates ( $\beta = 0.22 \pm 0.10$ ,  $z = 2.13$ ,  $P = 0.033$ ). Birth  
234 date had no effect on over winter survival ( $\beta = -0.01 \pm 0.09$ ,  $z = -0.08$ ,  $P = 0.936$ ), nor were there  
235 any differences between study areas ( $\beta = 0.19 \pm 0.18$ ,  $z = 1.06$ ,  $P = 0.289$ ). The random effect of  
236 litter ID explained a significant amount of variation ( $\sigma^2 = 0.665$ ; likelihood ratio test  $X^2 = 7.867$ ,  
237  $df = 20$ ,  $P = 0.005$ ), but the random year effect did not contribute significantly to the model.

238

### 239 *Territory ownership and over winter survival*

240 Sixty-one percent of juveniles alive in August owned a territory, and these juveniles were more  
241 likely (79 %) to survive over winter than those who did not (33 %;  $\beta = 2.78 \pm 0.23$ ,  $z = 12.06$ ,  $P$   
242  $< 0.001$ ). Juveniles without territories in August were less likely to survive in years of high lynx  
243 ( $\beta = -0.68 \pm 0.28$ ,  $z = -2.41$ ,  $P = 0.016$ ) and mustelid ( $\beta = -0.38 \pm 0.14$ ,  $z = -2.70$ ,  $P = 0.007$ )  
244 abundance. There was a significant interaction between lynx abundance and territory ownership

## Overwinter survival of juvenile red squirrels

245 ( $\beta = 0.99 \pm 0.23$ ,  $z = 4.22$ ,  $P < 0.001$ ; Fig 1); increased lynx abundance had no effect on the over  
246 winter survival of juveniles that held territories by autumn. The mustelid – owner interaction was  
247 not significant, but in the same direction as for lynx, with mustelid abundance having a weaker  
248 effect on territory owners ( $\beta = 0.31 \pm 0.18$ ,  $z = 1.75$ ,  $P = 0.080$ ; Fig 2). The effects of predators  
249 on juvenile survival did not depend on the abundance of alternate prey (lynx x hare  $P = 0.187$ ;  
250 mustelid x vole  $P = 0.203$ ), although both the hare ( $\beta = 0.40 \pm 0.20$ ,  $z = 1.99$ ,  $P = 0.046$ ) and vole  
251 ( $\beta = -0.59 \pm 0.13$ ,  $z = -4.57$ ,  $P < 0.001$ ) main effects were significant.

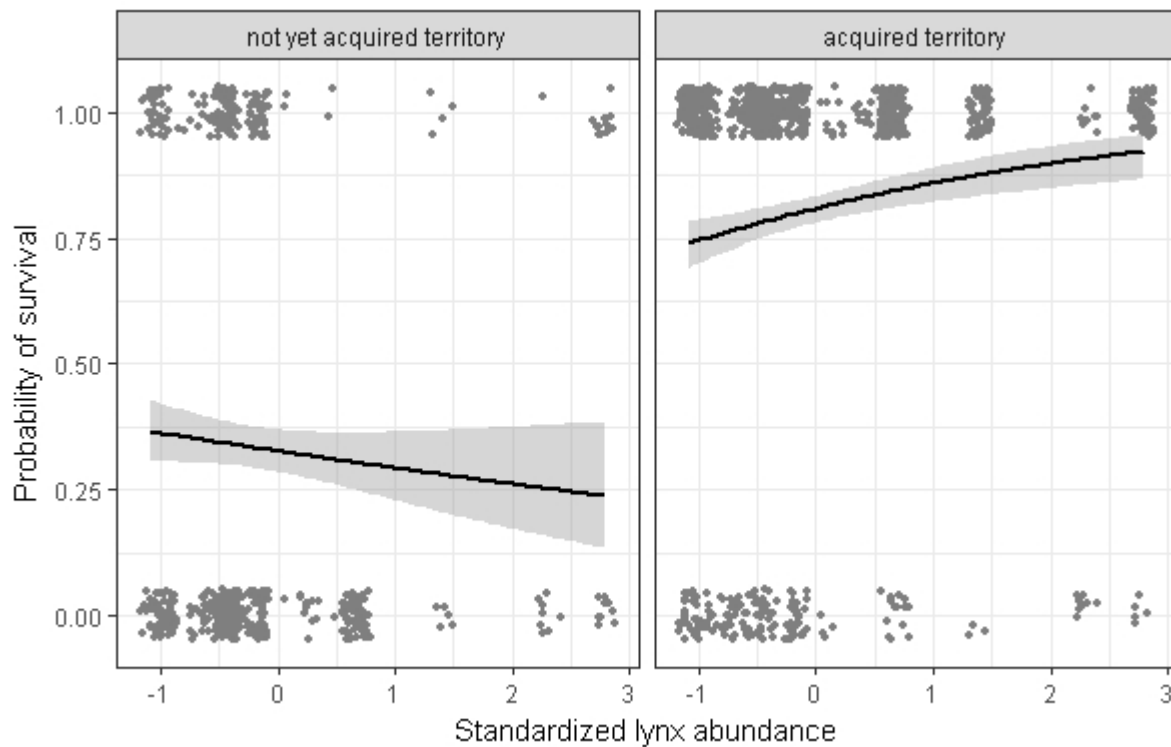

252  
253 Figure 1. Over winter survival of juveniles ( $n = 1305$ ) that had or had not acquired a territory by  
254 autumn. Juveniles without territories had lower survival when lynx were abundant (non-owners:  
255  $\beta = -0.68 \pm 0.28$ ,  $z = -2.41$ ,  $P = 0.016$ ), whereas the survival of juveniles with territories was  
256 unaffected by lynx abundance (owners:  $\beta = 0.31 \pm 0.21$ ,  $z = 1.49$ ,  $P = 0.14$ ; interaction  $\beta = 0.99$   
257  $\pm 0.23$ ,  $z = 4.22$ ,  $P < 0.001$ ).

258

## Overwinter survival of juvenile red squirrels

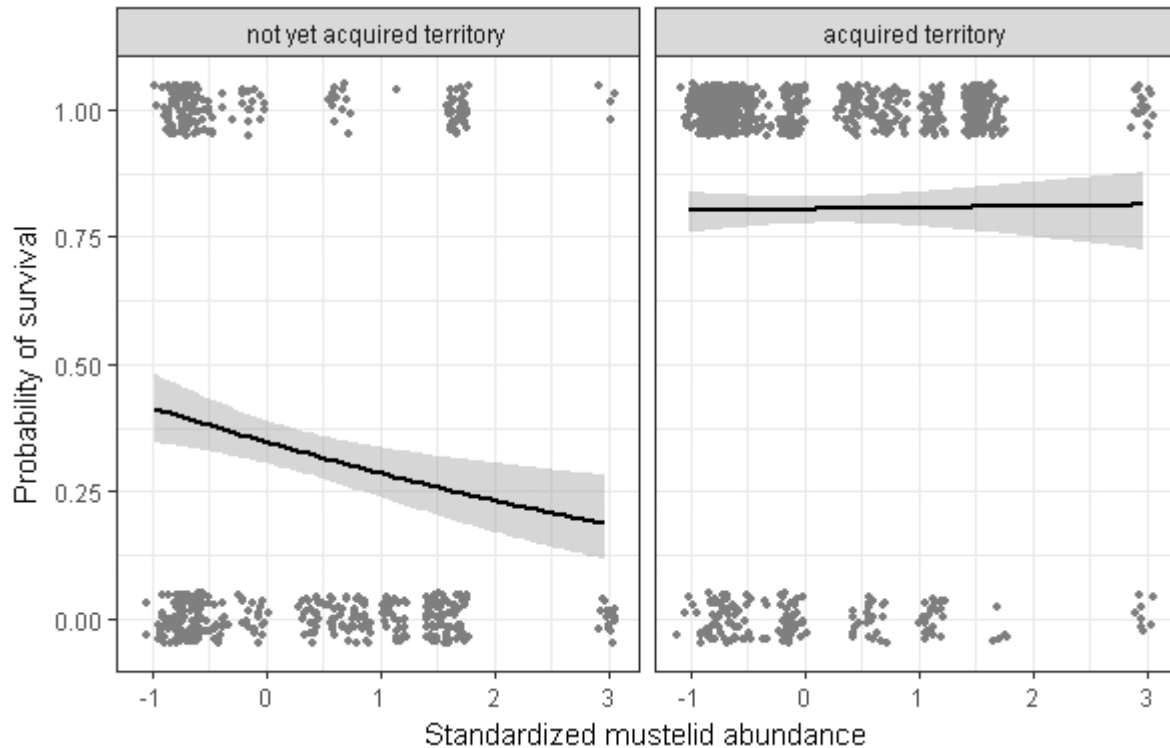

259

260 Figure 2. Over winter survival of juveniles ( $n = 1305$ ) that had or had not acquired a territory by  
261 autumn was lower when mustelids were abundant. Juveniles without territories by autumn were  
262 somewhat more affected by mustelid abundance (non-owners:  $\beta = -0.38 \pm 0.14$ ,  $z = -2.70$ ,  $P =$   
263  $0.007$ ) than territory owners (owners:  $\beta = -0.07 \pm 0.14$ ,  $z = -0.49$ ,  $P = 0.624$ ; interaction  $\beta = 0.31$   
264  $\pm 0.18$ ,  $z = 1.75$ ,  $P = 0.080$ ).

265

266 Temperature had opposing effects on survival for juveniles with and without territories by  
267 autumn (Fig 3). Juveniles without territories by autumn were less likely to survive warm winters  
268 ( $\beta = -0.35 \pm 0.18$ ,  $z = -1.99$ ,  $P = 0.047$ ), but this effect reversed for autumn territory owners  
269 (interaction  $\beta = 1.11 \pm 0.21$ ,  $z = 5.31$ ,  $P < 0.001$ ), which were more likely to survive warm  
270 winters ( $\beta = 0.76 \pm 0.13$ ,  $z = 5.31$ ,  $P < 0.001$ ).

## Overwinter survival of juvenile red squirrels

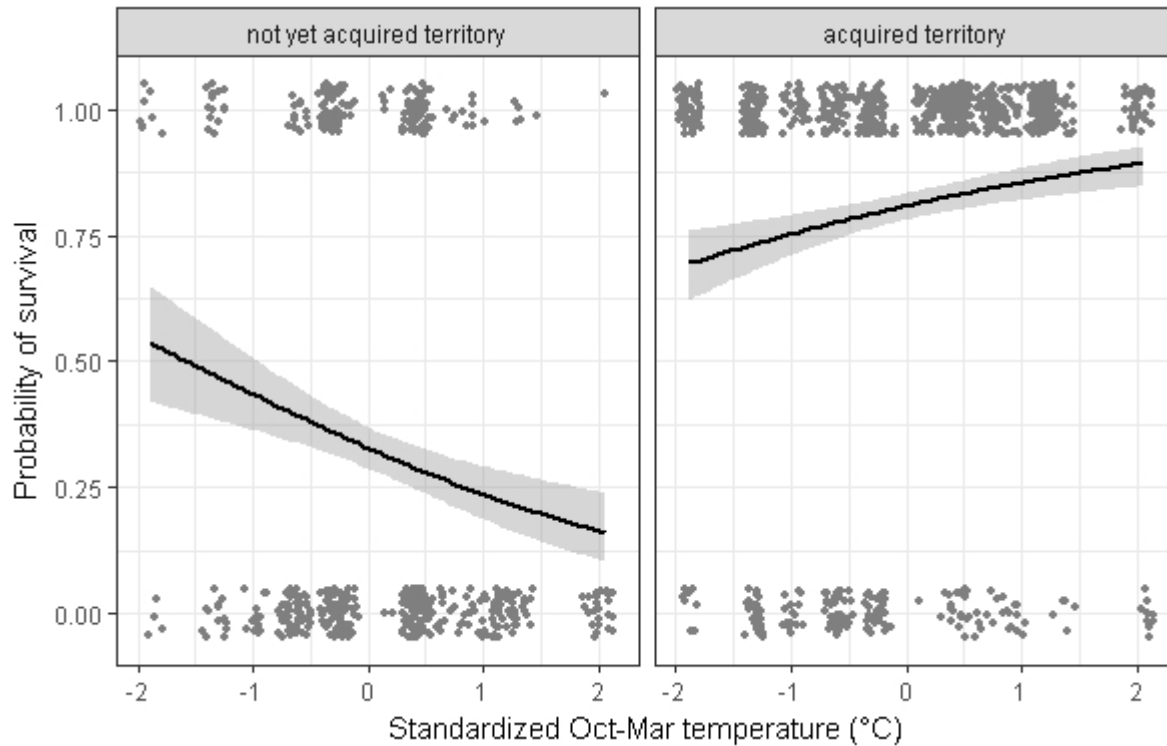

271

272 Figure 3. Over winter survival of juveniles ( $n = 1305$ ) that had or had not acquired a territory by  
273 autumn. Autumn territory owners survived better in warmer years (owners:  $\beta = 0.76 \pm 0.13$ ,  $z =$   
274  $5.87$ ,  $P < 0.001$ ), whereas warmer winters increased mortality of juveniles without territories at  
275 this time (non-owners:  $\beta = -0.35 \pm 0.18$ ,  $z = -1.99$ ,  $P = 0.047$ ; interaction  $\beta: = 1.11 \pm 0.21$ ,  $z =$   
276  $5.31$ ,  $P < 0.001$ ).

277

## 278 Discussion

279

280 Juveniles that acquired territories earlier in the year were far more likely to survive the winter  
281 than those that had not yet found a territory before autumn. Average survival of juveniles that  
282 acquired territories before the start of cone caching (79 %) was comparable to survival of early-  
283 life adults in this population (80 %; McAdam et al., 2007). Juveniles without territories by

## Overwinter survival of juvenile red squirrels

284 autumn had much lower survival (33 %), as they may have never acquired a territory and so  
285 perished or acquired one late but lost the opportunity to cache resources in it, and so did not have  
286 a large enough stockpile of resources to survive over winter. Their lower estimated survival is  
287 unlikely to be because the juveniles without a territory had in fact moved off our study area, as  
288 survival is equal between juveniles originating from the centre of the study area and those at the  
289 edge (T. D. Kerr et al., 2007).

290 Territory ownership also affected how susceptible juveniles were to predators and  
291 weather over winter. Juveniles without territories by autumn were more susceptible to predators  
292 than those that had already settled. Territory ownership provides access to arboreal nests, midden  
293 tunnels, and increased familiarity with the local habitat (Clarke et al., 1993). Juveniles without  
294 territories by autumn may be travelling more through potentially high-risk environments as they  
295 forage for food or search for territories over winter, thereby increasing their vulnerability to  
296 predators (Garrett & Franklin, 1988; Metzgar, 1967). Higher rates of litter loss in red squirrels  
297 during years of high mustelid abundance (Studd et al., 2015) suggests that mustelids can access  
298 red squirrel nests (and likely tunnels) whereas lynx may be more effectively deterred by these  
299 structures. This may explain why the relationship between mustelid abundance and survival was  
300 not influenced as strongly by territory acquisition as was the relationship between lynx  
301 abundance and survival.

302 Survival of juveniles without a territory was higher in colder winters, with the opposite  
303 being true for juveniles holding a territory by autumn. We predicted that cold winters would lead  
304 to higher over winter mortality of territory owners, and we expected this to be magnified for non-  
305 territory owners, not reversed. There are some situations in which colder winters lead to higher  
306 survival, such as hibernating species (bats *Chalinolobus tuberculatus*; Pryde, O'Donnell, &

## Overwinter survival of juvenile red squirrels

307 Barker, 2005; jumping mice *Zapus hudsonicus preblei*; Schorr, Lukacs, & Florent, 2009) where  
308 this is thought to be due to less frequent arousal from hibernation (Humphries, Thomas, &  
309 Speakman, 2002). Red squirrels are non-hibernating, so this mechanism cannot explain why non-  
310 territory owners would benefit from colder winters.

311 We can suggest two alternative (but not mutually exclusive) explanations for why  
312 juveniles that acquired a territory late would have higher survival over winter. First, in colder  
313 years the incidence of nest-sharing among non-territory owners might be higher. Nest sharing,  
314 typically between kin, occurs in 19 % of female territory owners in this system, and is more  
315 common in colder winters (Williams et al., 2013). Juveniles without territories in autumn may be  
316 more likely to share nests with fellow non-territory owners, and this may improve their survival  
317 relative to juveniles with territories in autumn. Second, higher mortality of territory owners in  
318 colder winters creates vacancies, which may allow juveniles without territories by autumn a  
319 greater opportunity to claim a territory with plentiful cached food, enhancing survival (Dunham,  
320 Warner, & Lawson, 1995). This would give them relatively improved survival compared to  
321 warmer years where few territory owners would die. Which, if either, of these mechanisms  
322 accounts for the differential effect of winter temperatures remains to be tested.

323 We found both lynx and mustelid abundances were negatively associated with juvenile  
324 over winter survival. Previous work found that predation does not exert a strong influence on red  
325 squirrel populations in the boreal forest (Boonstra, Boutin, et al., 2001). However, in this study,  
326 the effects of annual lynx and mustelid abundance on juvenile survival (-0.68 and -0.32 for those  
327 without territories by autumn) were comparable in strength to the effect of cone availability  
328 (0.38), which is the primary driver of red squirrel population dynamics (LaMontagne et al.,  
329 2013). The relatively strong effects of predators on over winter survival in this study might



## Overwinter survival of juvenile red squirrels

330 appear contradictory to previous findings, but two distinctions can be made. First, overall  
331 population size and individual probability of survival are not directly comparable. While red  
332 squirrel population size may be dictated by the availability of food and territories, predation  
333 could still affect *which* individuals survive (“compensatory predation”; Errington, 1946).  
334 Second, this study was concerned with over winter survival of only juveniles, and predator  
335 population size had the strongest effect on the 39 % of juveniles that did not have territories by  
336 autumn. The probability of survival of these juveniles is already low, so variation in survival in  
337 this subset is not likely to have a large impact on the total population size.

338         We predicted that the effects of lynx and mustelid population sizes on juvenile survival  
339 would be mediated by the availability of their alternate prey. We did not find a significant  
340 interaction of either predator–prey pairing on red squirrel survival. One potential explanation for  
341 this could be that predator populations closely track their prey. For example, there were few  
342 years in our dataset with high predator and low prey densities with which to evaluate these  
343 interactions. Additionally, we grouped three mustelid species together, and they may respond  
344 differently to vole abundance. Furthermore, although lynx switch from hares to red squirrels  
345 when the former are rare (O’Donoghue, Boutin, Krebs, Zuleta, et al., 1998), lynx and mustelids  
346 may predate on juvenile red squirrels opportunistically if juveniles are more susceptible to  
347 predation regardless of alternate prey availability. Juveniles without territories by autumn could  
348 be more susceptible to this, if it occurs.

349         We did not anticipate that the population sizes of voles and hares would have significant  
350 effects themselves on over winter survival of juvenile red squirrels. High hare abundance was  
351 associated with increased juvenile survival, while years with high vole abundances had lower  
352 juvenile survival. Red squirrels will opportunistically predate on snowshoe hare leverets in the

## Overwinter survival of juvenile red squirrels

353 spring and summer (O'Donoghue, 1994), but this additional food source should not have a strong  
354 effect over winter. Voles are not in strong competition with juveniles for resources, given red  
355 squirrels access arboreal food sources unavailable to voles, and red-backed voles are broad  
356 omnivores, feeding on vegetation, fungi, and arthropods (Boonstra, Krebs, Gilbert, & Schweiger,  
357 2001). These species' population densities may covary with another factor that influences  
358 juvenile survival not included in our analysis, but what this factor might be remains unclear.

359 In our survival model, juveniles with higher growth rates were more likely to survive to  
360 spring, but birth date had no effect. Previous work in this population has observed strong  
361 selection on both birth date and growth rate in annual survival of juveniles (Dantzer et al., 2013;  
362 Fisher et al., 2017; McAdam & Boutin, 2003; Williams, Lane, Humphries, McAdam, & Boutin,  
363 2014). In preliminary models not including territory ownership, there was a significant effect of  
364 birth date on over winter survival. Once accounting for territory ownership, birth date stopped  
365 being important. This implies that early born juveniles are likely to acquire a territory sooner, but  
366 there are no further benefits of birth date for survival over winter. Both earlier birth dates and  
367 higher growth rates are thought to be beneficial in territory acquisition, but there was still an  
368 effect of growth rate on over winter survival after accounting for territory ownership.  
369 Furthermore, larger juveniles in the autumn are more likely to survive to spring (Larivée et al.  
370 2010). Among juveniles for which we have body mass measurements in August ( $n = 757$ ),  
371 juveniles with higher relative growth rates were larger ( $\beta = 7.95 \pm 1.61$ ,  $t = 4.93$ ,  $P < 0.001$ ), but  
372 earlier birth dates also had a significant effect on body mass in August ( $\beta = -8.89 \pm 1.25$ ,  $t = -$   
373  $7.11$ ,  $P < 0.001$ ) so this does not explain why growth rate provides further benefits over winter  
374 but birth date does not. Presumably, growth rate may be associated with other life history and

375 behavioural traits (Biro & Stamps, 2008; Réale et al., 2010; Stamps, 2007) that could affect over  
376 winter survival.

377

### 378 *Conclusions*

379 We have identified how the timing of a life history event – territory acquisition – influences  
380 juvenile survival, and how it mediates biotic and abiotic factors that influence survival. This  
381 gives us insight into how one trait can affect the opportunity for selection on others, and  
382 therefore the routes through which organisms can arrive at “fit” phenotypes. We encourage more  
383 researchers to study key life stages such as the juvenile period, when survival can be highly  
384 variable and so the opportunity for selection high, to better understand how traits are selected in  
385 populations. As this study was primarily concerned with over winter dynamics, investigations of  
386 juveniles during territory prospection and before settlement, and which traits or conditions are  
387 associated with territorial acquisition, would be informative in further explaining the  
388 mechanisms behind some of the patterns we observed.

389

### 390 **Acknowledgements**

391 We acknowledge that the lands on which we have conducted our research for the past 30 years  
392 are within the traditional territory of the Champagne and Aishihik First Nations. We thank Agnes  
393 MacDonald for providing access to her trapline. We thank the many people that have been  
394 involved in data collection over the years within the Kluane Red Squirrel Project, and many  
395 thanks to Charles Krebs and the Kluane Boreal Forest Ecosystem Project and Community  
396 Ecological Monitoring Program for making their data freely available to the public. The Natural

## Overwinter survival of juvenile red squirrels

397 Sciences and Engineering Council of Canada, the National Science Foundation, and the Northern  
398 Scientific Training Program provided research support. We have no conflicts of interest. This is  
399 paper number XX of the Kluane Red Squirrel Project.

### 400 **Author contributions**

401 JH and DF conceived the ideas and conducted the analyses; JH, DF, and ARM led the writing of  
402 the manuscript; SB, BD, JL, and AGM managed long term data collection and revised initial  
403 drafts and analyses. All authors contributed critically to the drafts and gave final approval for  
404 publication.

### 405 **Data accessibility**

406 Data used to evaluate juvenile over winter survival, along with code to recreate analyses and  
407 figures, will be made available on Dryad upon publication.

### 408 **Literature Cited**

- 409 Bates, D., Maechler, M., Bolker, B., & Walker, S. (2015). Fitting linear mixed-effects models  
410 using lme4. *Journal of Statistical Software*, 67:1–8. doi:10.18637/jss.v067.i01
- 411 Berteaux, D., & Boutin, S. (2000). Breeding dispersal in female North American red squirrels.  
412 *Ecology*, 81(5), 1311–1326. Retrieved from [http://doi.wiley.com/10.1890/0012-](http://doi.wiley.com/10.1890/0012-9658(2000)081[1311:BDIFNA]2.0.CO;2)  
413 9658(2000)081[1311:BDIFNA]2.0.CO;2
- 414 Biro, P. A., & Stamps, J. A. (2008). Are animal personality traits linked to life-history  
415 productivity? *Trends in Ecology & Evolution*, 23(7), 361–368.  
416 doi:10.1016/j.tree.2008.04.003
- 417 Boonstra, R., Boutin, S., Byrom, A., Karels, T. I. M., Hubbs, A., Stuart-smith, K., ... Antpoebler,  
418 S. (2001). The Role of Red Squirrels and Arctic Ground Squirrels. *Ecosystem Dynamics of*

Overwinter survival of juvenile red squirrels

- 419        *the Boreal Forest: The Kluane Project*, 179–215.
- 420    Boonstra, R., & Krebs, C. J. (2006). Population limitation of the northern red-backed vole in the  
421        boreal forests of northern Canada. *Journal of Animal Ecology*, 75(6), 1269–1284.  
422        doi:10.1111/j.1365-2656.2006.01149.x
- 423    Boonstra, R., Krebs, C. J., Gilbert, B., & Schweiger, S. (2001). Voles and Mice. In C. J. Krebs,  
424        S. Boutin, & R. Boonstra (Eds.), *Ecosystem Dynamics of the Boreal Forest: The Kluane*  
425        *Project* (pp. 215–239). New York: Oxford University Press.
- 426    Boutin, S., Krebs, C. J., Boonstra, R., Dale, M. R. T., Hannon, S. J., Martin, K., ... Schweiger, S.  
427        (1995). Population changes of the vertebrate community during a snowshoe hare cycle in  
428        Canada's boreal forest. *Oikos*, 74(1), 69. doi:10.2307/3545676
- 429    Boutin, S., & Schweiger, S. (1988). Manipulation of intruder pressure in red squirrels  
430        (*Tamiasciurus hudsonicus*): effects on territory size and acquisition. *Canadian Journal of*  
431        *Zoology*, 66(10), 2270–2274. doi:10.1139/z88-337
- 432    Carpenter, F. L. (1987). Food abundance and territoriality: To defend or not to defend?  
433        *Integrative and Comparative Biology*, 27(2), 387–399. doi:10.1093/icb/27.2.387
- 434    Clarke, M. F., Burke, K., Lair, H., Pocklington, R., Clarke, M. F., Burke, K., ... Robert, L.  
435        (1993). Familiarity affects escape behaviour of the Eastern chipmunk, *Tamias striatus*.  
436        *Oikos*, 66(3), 533–537.
- 437    Cooper, E. B., Taylor, R. W., Kelley, A. D., Martinig, A. R., Boutin, S., Humphries, M. M., ...  
438        McAdam, A. G. (2017). Personality is correlated with natal dispersal in North American red  
439        squirrels (*Tamiasciurus hudsonicus*). *Behaviour*. doi:10.1163/1568539X-00003450
- 440    Cowlshaw, G. (1997). Refuge use and predation risk in a desert baboon population. *Animal*  
441        *Behaviour*, 54(2), 241–253. doi:10.1006/anbe.1996.0466

Overwinter survival of juvenile red squirrels

- 442 Dantzer, B., Newman, A. E. M., Boonstra, R., Palme, R., Boutin, S., Humphries, M. M., &  
443 McAdam, A. G. (2013). Density triggers maternal hormones that increase adaptive  
444 offspring growth in a wild mammal. *Science*, *340*(6137), 1215–1217.  
445 doi:10.1126/science.1235765
- 446 Descamps, S., Boutin, S., Berteaux, D., & Gaillard, J.-M. (2008). Age-specific variation in  
447 survival, reproductive success and offspring quality in red squirrels: evidence of  
448 senescence. *Oikos*, *117*(9), 1406–1416. doi:10.1111/j.0030-1299.2008.16545.x
- 449 Dunham, M. L., Warner, R. R., & Lawson, J. W. (1995). The dynamics of territory acquisition: a  
450 model of two coexisting strategies. *Theoretical Population Biology*, *47*, 347–364.
- 451 Errington, P. L. (1946). Predation and Vertebrate Populations. *The Quarterly Review of Biology*,  
452 *21*(2), 144–177. doi:10.1086/395220
- 453 Everett, R. A., & Ruiz, G. M. (1993). Coarse woody debris as a refuge from predation in aquatic  
454 communities. An experimental test. *Oecologia*, *93*(4), 475–486.
- 455 Ferguson, G. W., & Fox, S. F. (1984). Annual variation of survival advantage of large juvenile  
456 side-blotched lizards, *Uta stansburiana*: its causes and evolutionary significance. *Evolution*,  
457 *38*(2), 342–349.
- 458 Fisher, D. N., Boutin, S., Dantzer, B., Humphries, M. M., Lane, J. E., & McAdam, A. G. (2017).  
459 Multilevel and sex-specific selection on competitive traits in North American red squirrels.  
460 *Evolution*, *71*(7), 1841–1854. doi:10.1111/evo.13270
- 461 Fisher, D. N., Haines, J. A., Boutin, S., Dantzer, B., Lane, J. E., Coltman, D. W., & McAdam, A.  
462 G. (2019). Indirect effects on fitness between individuals that have never met via an  
463 extended phenotype. *Ecology Letters*. doi:10.1111/ele.13230
- 464 Fletcher, Q. E., Boutin, S., Lane, J. E., LaMontagne, J. M., McAdam, A. G., Krebs, C. J., &

- 465 Humphries, M. M. (2010). The functional response of a hoarding seed predator to mast  
466 seeding. *Ecology*, *91*(9), 2673–2683. doi:10.1890/09-1816.1
- 467 Fletcher, Q. E., Landry-Cuerrier, M., Boutin, S., McAdam, A. G., Speakman, J. R., &  
468 Humphries, M. M. (2013). Reproductive timing and reliance on hoarded capital resources  
469 by lactating red squirrels. *Oecologia*, *173*(4), 1203–1215. doi:10.1007/s00442-013-2699-3
- 470 Fuller, W. A., Stebbins, L. L., & Dyke, G. R. (1969). Overwintering of small mammals near  
471 Great Slave Lake Northern Canada. *Arctic*, *22*(1), 34–55. doi:10.2307/40507757
- 472 Gaillard, J.-M., Festa-Bianchet, M., Yoccoz, N. G., Loison, A., & Toïgo, C. (2000). Temporal  
473 Variation in Fitness Components and Population Dynamics of Large Herbivores. *Annual*  
474 *Review of Ecology and Systematics*, *31*(1), 367–393. doi:10.1146/annurev.ecolsys.31.1.367
- 475 Gaillard, J. M., Festa-Bianchet, M., & Yoccoz, N. G. (1998). Population dynamics of large  
476 herbivores: Variable recruitment with constant adult survival. *Trends in Ecology and*  
477 *Evolution*, *13*(2), 58–63. doi:10.1016/S0169-5347(97)01237-8
- 478 Garrett, M. G., & Franklin, W. L. (1988). Behavioral Ecology of Dispersal in the Black-Tailed  
479 Prairie Dog. *Journal of Mammalogy*, *69*(2), 236–250. doi:10.2307/1381375
- 480 Goheen, J. R., & Swihart, R. K. (2005). Resource selection and predation of North American red  
481 squirrels in deciduous forest fragments. *Journal of Mammalogy*, *86*(1), 22–28.  
482 doi:10.1644/1545-1542(2005)086<0022:rsapon>2.0.co;2
- 483 Greenwood, P. J., & Harvey, P. H. (1982). The natal and breeding dispersal of birds. *Annual*  
484 *Review of Ecology and Systematics*, *13*, 1–21.
- 485 Haines, J. A., Coltman, D. W., Dantzer, B., Gorrell, J. C., Humphries, M. M., Lane, J. E., ...  
486 Boutin, S. (2018). Sexually selected infanticide by male red squirrels in advance of a mast  
487 year. *Ecology*. doi:10.1002/ecy.2158

- 488 Humphries, M. M., & Boutin, S. (2000). The Determinants of Optimal Litter Size in Free-  
489 Ranging Red Squirrels. *Ecology*, *81*(10), 2867–2877. Retrieved from  
490 <http://www.jstor.org/stable/177347?origin=crossref>
- 491 Humphries, M. M., Thomas, D. W., & Speakman, J. R. (2002). Climate-mediated energetic  
492 constraints on the distribution of hibernating mammals. *Nature*, *418*(6895), 313–316.  
493 doi:10.1038/nature00828
- 494 Jackson, D. M., Trayhurn, P., & Speakman, J. R. (2001). Associations between energetics and  
495 over-winter survival in the short-tailed field vole *Microtus agrestis*. *Journal of Animal*  
496 *Ecology*, *70*(4), 633–640. doi:10.1046/j.1365-2656.2001.00518.x
- 497 Kerr, T. D., Boutin, S., LaMontagne, J. M., McAdam, A. G., & Humphries, M. M. (2007).  
498 Persistent maternal effects on juvenile survival in North American red squirrels. *Biology*  
499 *Letters*, *3*(3), 289–291. doi:10.1098/rsbl.2006.0615
- 500 Kerr, T., & Descamps, S. (2008). Why do North American red squirrel, *Tamiasciurus*  
501 *hudsonicus*, mothers relocate their young? A predation-based hypothesis. *Canadian Field-*  
502 *Naturalist*, *122*(1), 65–66. doi:10.1258/la.2010.010166
- 503 Krebs, C. J. (2001). General Introduction. In C. J. Krebs, S. Boutin, & R. Boonstra (Eds.),  
504 *Ecosystem Dynamics of the Boreal Forest: The Kluane Project* (pp. 3–8). New York:  
505 Oxford University Press. doi:10.1016/S0006-3495(64)86921-6
- 506 Lair, H. (1990). The calls of the red squirrel — a contextual analysis of function. *Behaviour*,  
507 *115*(3), 254–282. doi:10.1163/156853990X00608
- 508 LaMontagne, J. M., Peters, S., & Boutin, S. (2005). A visual index for estimating cone  
509 production for individual white spruce trees. *Canadian Journal of Forest Research*, *35*(12),  
510 3020–3026. doi:10.1139/x05-210



Overwinter survival of juvenile red squirrels

- 511 LaMontagne, J. M., Williams, C. T., Donald, J. L., Humphries, M. M., McAdam, A. G., &  
512 Boutin, S. (2013). Linking intraspecific variation in territory size, cone supply, and survival  
513 of North American red squirrels. *Journal of Mammalogy*, 94(5), 1048–1058.  
514 doi:10.1644/12-MAMM-A-245.1
- 515 Lane, J. E., McAdam, A. G., Charmantier, A., Humphries, M. M., Coltman, D. W., Fletcher, Q.,  
516 ... Boutin, S. (2015). Post-weaning parental care increases fitness but is not heritable in  
517 North American red squirrels. *Journal of Evolutionary Biology*, 28(6), 1203–12.  
518 doi:10.1111/jeb.12633
- 519 Larivée, M. L., Boutin, S., Speakman, J. R., McAdam, A. G., & Humphries, M. M. (2010).  
520 Associations between over-winter survival and resting metabolic rate in juvenile North  
521 American red squirrels. *Functional Ecology*, 24(3), 597–607. doi:10.1111/j.1365-  
522 2435.2009.01680.x
- 523 Larsen, K. W., & Boutin, S. (1994). Movements, survival, and settlement of red squirrel  
524 (*Tamiasciurus hudsonicus*) offspring. *Ecology*, 75(1), 214–223. doi:10.2307/1939395
- 525 McAdam, A. G., & Boutin, S. (2003). Variation in viability selection among cohorts of juvenile  
526 red squirrels (*Tamiasciurus hudsonicus*). *Evolution; International Journal of Organic*  
527 *Evolution*, 57(7), 1689–1697. doi:10.1111/j.0014-3820.2003.tb00374.x
- 528 McAdam, A. G., Boutin, S., Sykes, A. K., & Humphries, M. M. (2007). Life histories of female  
529 red squirrels and their contributions to population growth and lifetime fitness. *Ecoscience*,  
530 14(3), 362. doi:10.2980/1195-6860(2007)14[362:LHOFRS]2.0.CO;2
- 531 Merritt, J. F. (1986). Winter Survival Adaptations of the Short-Tailed Shrew (*Blarina*  
532 *brevicauda*) in an Appalachian Montane Forest. *Journal of Mammalogy*, 67(3), 450–464.  
533 doi:10.2307/1381276

- 534 Metzgar, L. H. (1967). An experimental comparison of screech owl predation on resident and  
535 transient white-footed mice (*Peromyscus leucopus*). *Journal of Mammalogy*, 48(3), 387–  
536 391. doi:10.2307/1377771
- 537 Morrison, S. F., Pelchat, G., Donahue, A., & Hik, D. S. (2009). Influence of food hoarding  
538 behavior on the over-winter survival of pikas in strongly seasonal environments. *Oecologia*,  
539 159(1), 107–116. doi:10.1007/s00442-008-1197-5
- 540 O'Connor, C. M., Norris, D. R., Crossin, G. T., & Cooke, S. J. (2014). Biological carryover  
541 effects: linking common concepts and mechanisms in ecology and evolution. *Ecosphere*,  
542 5(3), 28.
- 543 O'Donoghue, M. (1994). Early survival of juvenile snowshoe hares. *Ecology*, 75(6), 1582–1592.
- 544 O'Donoghue, M., Boutin, S., Hofer, E. J., & Boonstra, R. (2001). Other mammalian predators. In  
545 C. J. Krebs, S. Boutin, & R. Boonstra (Eds.), *Ecosystem Dynamics of the Boreal Forest: The Kluane Project* (pp. 325–336). New York: Oxford University Press.
- 547 O'Donoghue, M., Boutin, S., Krebs, C. J., Murray, D. L., & Hofer, E. J. (1998). Behavioural  
548 responses of coyotes and lynx to the snowshoe hare cycle. *Oikos*, 82, 169–183.
- 549 O'Donoghue, M., Boutin, S., Krebs, C. J., Zuleta, G., Dennis, L., Donoghue, M. O., ... Hofer, E.  
550 J. (1998). Functional responses of coyotes and lynx to the snowshoe hare cycle. *Ecology*,  
551 79(4), 1193–1208. doi:10.1890/0012-9658(1998)079[1193:FROCAL]2.0.CO;2
- 552 Oli, M. K., & Dobson, F. S. (2003). The Relative Importance of Life-History Variables to  
553 Population Growth Rate in Mammals: Cole's Prediction Revisited. *The American*  
554 *Naturalist*, 161(3), 422–440. doi:10.1086/367591
- 555 Pryde, M. A., O'Donnell, C. F. J., & Barker, R. J. (2005). Factors influencing survival and long-  
556 term population viability of New Zealand long-tailed bats (*Chalinolobus tuberculatus*):

Overwinter survival of juvenile red squirrels

- 557 Implications for conservation. *Biological Conservation*, 126(2), 175–185.  
558 doi:10.1016/J.BIOCON.2005.05.006
- 559 Réale, D., Garant, D., Humphries, M. M., Bergeron, P., Careau, V., & Montiglio, P.-O. (2010).  
560 Personality and the emergence of the pace-of-life syndrome concept at the population level.  
561 *Philosophical Transactions of the Royal Society of London. Series B, Biological Sciences*,  
562 365(1560), 4051–4063. doi:10.1098/rstb.2010.0208
- 563 Rödel, H. G., Bora, A., Kaetzke, P., Khaschei, M., Hutzelmeyer, H., & von Holst, D. (2004).  
564 Over-winter survival in subadult European rabbits: weather effects, density dependence, and  
565 the impact of individual characteristics. *Oecologia*, 140(4), 566–576. doi:10.1007/s00442-  
566 004-1616-1
- 567 Rödel, H. G., Zapka, M., Talke, S., Kornatz, T., Bruchner, B., & Hedler, C. (2015). Survival  
568 costs of fast exploration during juvenile life in a small mammal. *Behavioral Ecology and*  
569 *Sociobiology*, 69(2), 205–217. doi:10.1007/s00265-014-1833-5
- 570 Rodríguez, S., van Noordwijk, A. J., Álvarez, E., & Barba, E. (2016). A recipe for postfledging  
571 survival in great tits *Parus major*: be large and be early (but not too much). *Ecology and*  
572 *Evolution*, 6(13), 4458–4467. doi:10.1002/ece3.2192
- 573 Schielzeth, H. (2010). Simple means to improve the interpretability of regression coefficients.  
574 *Methods in Ecology and Evolution*, 1(2), 103–113. doi:10.1111/j.2041-210X.2010.00012.x
- 575 Schorr, R. A., Lukacs, P. M., & Florant, G. L. (2009). Body Mass and Winter Severity as  
576 Predictors of Overwinter Survival in Preble’s Meadow Jumping Mouse. *Journal of*  
577 *Mammalogy*, 90(1), 17–24. doi:10.1644/07-MAMM-A-392.1
- 578 Searcy, S. P., & Sponaugle, S. (2001). Selective mortality during the larval – juvenile transition  
579 in two coral reef fishes. *Ecology*, 82(9), 2452–2470. doi:10.1890/0012-

Overwinter survival of juvenile red squirrels

- 580 9658(2001)082[2452:SMDTLJ]2.0.CO;2
- 581 Smith, C. C. (1968). The adaptive nature of social organization in the genus of tree squirrels  
582 *Tamiasciurus*. *Ecological Monographs*, 38(1), 31–64.
- 583 Stamps, J. A. (2007). Growth-mortality tradeoffs and “personality traits” in animals. *Ecology*  
584 *Letters*, 10(5), 355–363. doi:10.1111/j.1461-0248.2007.01034.x
- 585 Steele, M. A. (1998). *Tamiasciurus hudsonicus*. *Mammalian Species*, 586(586), 1–9.  
586 doi:10.1890/0012-9623(2004)85
- 587 Stuart-Smith, A. K., & Boutin, S. (1995). Predation on red squirrels during a snowshoe hare  
588 decline. *Canadian Journal of Zoology*, 73(4), 713–722. doi:10.1139/z95-083
- 589 Studd, E. K., Boutin, S., McAdam, A. G., Krebs, C. J., & Humphries, M. M. (2015). Predators,  
590 energetics and fitness drive neonatal reproductive failure in red squirrels. *Journal of Animal*  
591 *Ecology*, 84(1), 249–259. doi:10.1111/1365-2656.12279
- 592 van der Jeugd, H., & Larsson, K. (1998). Pre-breeding survival of barnacle geese *Branta*  
593 *leucopsis* in relation to fledgling characteristics. *Journal of Animal Ecology*, 67, 953–966.
- 594 Whitham, T. G. (1986). Costs and benefits of territoriality: behavioral and reproductive release  
595 by competing aphids. *Ecology*, 67(1), 139–147. doi:10.2307/1938512
- 596 Williams, C. T., Gorrell, J. C., Lane, J. E., McAdam, A. G., Humphries, M. M., & Boutin, S.  
597 (2013). Communal nesting in an ‘asocial’ mammal: social thermoregulation among  
598 spatially dispersed kin. *Behavioral Ecology and Sociobiology*, 67(5), 757–763.  
599 doi:10.1007/s00265-013-1499-4
- 600 Williams, C. T., Lane, J. E., Humphries, M. M., McAdam, A. G., & Boutin, S. (2014).  
601 Reproductive phenology of a food-hoarding mast-seed consumer: Resource- and density-  
602 dependent benefits of early breeding in red squirrels. *Oecologia*, 174(3), 777–788.

Overwinter survival of juvenile red squirrels

603           doi:10.1007/s00442-013-2826-1

604    Wunder, B. A., Dobkin, D. S., & Gettinger, R. D. (1977). Shifts of thermogenesis in the prairie

605           vole. *Oecologia*, 29, 11–26.

606

## Overwinter survival of juvenile red squirrels

### 607 **Tables**

608 Table 1. Probability of over winter survival for juvenile red squirrels alive in August 1989 –  
609 2015 ( $n = 1305$ ), with adult density for each year (individuals/ha) and number of juveniles alive  
610 in autumn (cohort size).

| Year | Adult population density<br>(individuals/ha) | Autumn cohort size | Juvenile survival (%) |
|------|----------------------------------------------|--------------------|-----------------------|
| 1989 | 1.25                                         | 6                  | 66.7                  |
| 1990 | 1.30                                         | 13                 | 61.5                  |
| 1991 | 1.18                                         | 28                 | 85.7                  |
| 1992 | 1.31                                         | 46                 | 30.4                  |
| 1993 | 1.23                                         | 121                | 71.1                  |
| 1994 | 2.20                                         | 28                 | 21.4                  |
| 1995 | 1.60                                         | 75                 | 82.7                  |
| 1996 | 1.88                                         | 15                 | 60.0                  |
| 1997 | 1.86                                         | 51                 | 94.1                  |
| 1998 | 2.14                                         | 78                 | 82.1                  |
| 1999 | 3.93                                         | 25                 | 36.0                  |
| 2000 | 2.56                                         | 24                 | 58.3                  |
| 2001 | 1.84                                         | 56                 | 51.8                  |
| 2002 | 1.63                                         | 49                 | 51.0                  |
| 2003 | 1.22                                         | 34                 | 70.6                  |
| 2004 | 1.02                                         | 44                 | 61.4                  |
| 2005 | 1.05                                         | 98                 | 66.3                  |
| 2006 | 2.02                                         | 47                 | 46.8                  |
| 2007 | 1.40                                         | 72                 | 55.6                  |
| 2008 | 1.40                                         | 30                 | 43.3                  |
| 2009 | 0.94                                         | 44                 | 50.0                  |
| 2010 | 0.73                                         | 100                | 66.0                  |
| 2011 | 1.75                                         | 32                 | 81.3                  |
| 2012 | 1.86                                         | 50                 | 46.0                  |
| 2013 | 1.73                                         | 54                 | 63.0                  |

### Overwinter survival of juvenile red squirrels

|                  |                 |              |                |
|------------------|-----------------|--------------|----------------|
| 2014             | 1.57            | 150          | 71.3           |
| 2015             | 3.15            | 18           | 44.4           |
| Average $\pm$ SE | 1.69 $\pm$ 0.13 | 51 $\pm$ 6.6 | 60.0 $\pm$ 3.4 |

---

611

612

Overwinter survival of juvenile red squirrels

613 Table 2. Mixed effects binomial model of juveniles red squirrel over winter survival ( $n = 1305$ ),  
 614 testing whether territory ownership by autumn mediates effects of predators and temperature on  
 615 over winter survival, including random effects of litter ID and year (conditional  $R^2 = 0.44$ ).

| Term                                  | Estimate $\pm$ SE | $z$   | $P$     |
|---------------------------------------|-------------------|-------|---------|
| Std. density                          | -0.69 $\pm$ 0.15  | -4.45 | < 0.001 |
| Std. cones                            | 0.38 $\pm$ 0.11   | 3.45  | < 0.001 |
| Std. growth rate                      | 0.22 $\pm$ 0.10   | 2.13  | 0.033   |
| Std. birth date                       | -0.01 $\pm$ 0.09  | -0.08 | 0.936   |
| Grid (SU)                             | 0.19 $\pm$ 0.18   | 1.06  | 0.289   |
| Sex (male)                            | -0.49 $\pm$ 0.16  | -3.1  | 0.002   |
| Autumn owner (yes)                    | 2.78 $\pm$ 0.23   | 12.06 | < 0.001 |
| Std. lynx                             | -0.68 $\pm$ 0.28  | -2.41 | 0.016   |
| Std. hares                            | 0.40 $\pm$ 0.20   | 1.99  | 0.046   |
| Std. mustelid                         | -0.38 $\pm$ 0.14  | -2.7  | 0.007   |
| Std. voles                            | -0.59 $\pm$ 0.13  | -4.57 | < 0.001 |
| Std. temperature                      | -0.35 $\pm$ 0.18  | -1.99 | 0.047   |
| Std. lynx : Std. hares                | 0.12 $\pm$ 0.09   | 1.32  | 0.187   |
| Std. mustelid : Std. voles            | 0.14 $\pm$ 0.11   | 1.27  | 0.203   |
| Autumn owner (yes) : Std. lynx        | 0.99 $\pm$ 0.23   | 4.22  | < 0.001 |
| Autumn owner (yes) : Std. mustelid    | 0.31 $\pm$ 0.18   | 1.75  | 0.080   |
| Autumn owner (yes) : Std. temperature | 1.11 $\pm$ 0.21   | 5.31  | < 0.001 |
| Random effects                        | Variance          |       |         |
| Litter ID                             | 0.665             |       |         |
| Year                                  | 0.000             |       |         |

616
